# Supplementary material for: Influence of the distal guanidine group on the rate and selectivity of O2 reduction by iron porphyrin
Source: Royal Society of Chemistry journal article supplement (doi:10.1039/c9sc02711d), 2019-01-01
Supplement: c9sc02711d1.pdf [file c9sc02711d1.pdf]

## **Supporting Information of**

### **Influence of the Distal Guanidine Group on Rate and Selectivity of O<sub>2</sub> Reduction by Iron Porphyrin**

**Arnab Ghatak, Snehadri Bhakta, Sarmistha Bhunia and Abhishek Dey\***

**School of Chemical Sciences, Indian Association for the Cultivation of  
Science, 2A & 2B Raja S. C. Mullick Road, Jadavpur, Kolkata, 700032**

#### **Table of contents**

|                                     |                |
|-------------------------------------|----------------|
| <b>1.Experimental details</b>       | <b>S2-S4</b>   |
| <b>2.Synthetic Procedure</b>        | <b>S5-S10</b>  |
| <b>3.Construction of electrodes</b> | <b>S10-S11</b> |
| <b>4.Spectral data</b>              | <b>S12-S24</b> |
| <b>5.Electrochemical data</b>       | <b>S25-S32</b> |
| <b>6.DFT Optimized Structures</b>   | <b>S33-S34</b> |

## 1. Experimental Details

### 1.1. Materials

All reagents were of highest grade commercially available product. Thiourea, sodium hydride (60% in mineral oil), Boc anhydride,  $\text{HgCl}_2$ , triethylamine, hydrochloric acid, collidine  $\text{Na}_2\text{SO}_4$ ,  $\text{NaN}_3$ , and pyrrole were purchased from spectrochem Ltd. Diethyl ether, THF, acetonitrile, dichloromethane, DMF, chlorobenzene, acetic acid, and methanol were purchased from Merck. Anhydrous ferrous bromide ( $\text{FeBr}_2$ ), 2,4,6-collidine, 11-Bromo undecan-1-ol ( $\text{BrC}_{11}\text{OH}$ ), Methane sulfonyl chloride ( $\text{OMsCl}$ ), Potassium thioacetate ( $\text{KSAC}$ ), Octanethiol ( $\text{C}_8\text{SH}$ ), potassium hexafluorophosphate ( $\text{KPF}_6$ ), cyclohexanone, benzylalcohol, and all buffers were purchased from Sigma-Aldrich. Disodium hydrogen phosphate dihydrate ( $\text{Na}_2\text{HPO}_4 \cdot 2\text{H}_2\text{O}$ ), potassium chloride ( $\text{KCl}$ ), imidazole ( $\text{Imd}$ ), conc. Hydrochloric acid ( $\text{HCl}$ ), cyclohexane, and cyclohexanol were purchased from Merck. Au wafers were purchased from Platypus Technologies (1000 Å of Au on 50 Å of Ti adhesion layer on top of a Si(III) surface) and Au discs for the Rotating Ring Disc Electrochemistry (RRDE) experiments were purchased from Pine Instruments, U.S.A.

### 1.2. Instrumentation

All electrochemical experiments were carried out using CH instruments (model CHI700E, CHI710D Electrochemical Analyzer). Biopotentiostat, reference electrodes, Teflon plate material evaluating cell (ALS Japan) were purchased from CH Instruments. The RRDE set up from Pine Research Instrumentation (E6 series ChangeDisk tips with AFE6M rotor) was used to obtain the RRDE data. All the NMR spectra were recorded on a Bruker DPX-400 or DPX-500 spectrometer at room temperature. The mass spectra were recorded by QTOF Micro YA263 instrument. UV-vis absorption data were taken in an Agilent technologies spectrophotometer model 8453 fitted with a diode-array detector. The EPR spectra were recorded on a JEOL instrument.

## 1.3. Electrochemical Measurements

### 1.3.1. Cyclic Voltammetry

All CV experiments were done in pH 7 buffer containing 100 mM  $\text{Na}_2\text{HPO}_4 \cdot 2\text{H}_2\text{O}$  and 100 mM  $\text{KPF}_6$  (supporting electrolyte) using Pt wire as the counter electrode and Ag/AgCl as the reference electrode.

### 1.3.2. Rotating Disc electrochemistry (RDE)

The RDE measurements were performed on a CHI 700E bi-potentiostat with a Pine Instruments Modulated speed rotor fitted with an E6 series changedisc tip. The graphite surface was cleaned by polishing it uniformly on a Silicon carbide grinding paper. The complex was physisorbed on the disc as described above. The RDE experiment was done at different rotations 50 rpm, 100 rpm, 150 rpm, 200 rpm, 250 rpm, and the 2<sup>nd</sup> order rate constant was calculated using Koutecky–Levich analysis. Koutecky–Levich equation,

$i^{-1} = i_k(E)^{-1} + i_L^{-1}$ , where  $i_k(E)$  is the potential dependent kinetic current expressed as  $nFA[\text{O}_2]k_{\text{cat}}\Gamma_{\text{catalyst}}$ , and  $i_L$  is the Levich current.  $i_L$  is expressed as  $0.62nFA[\text{O}_2](D_{\text{O}_2})^{2/3} \omega^{1/2} \nu^{-1/6}$ , where  $n$  is the number of electrons transferred to the substrate,  $F$  is the faraday constant,  $A$  is the macroscopic area of the disc ( $0.192 \text{ cm}^2$ ),  $[\text{O}_2]$  is the concentration of  $\text{O}_2$  in an air saturated buffer (0.26 mM) at  $25^\circ \text{C}$ ,  $k_{\text{cat}}$  is the 2<sup>nd</sup> order rate of catalytic  $\text{O}_2$  reduction,  $\Gamma_{\text{catalyst}}$  is the catalyst concentration in moles/ $\text{cm}^2$ ,  $D_{\text{O}_2}$  is the diffusion coefficient of  $\text{O}_2$  ( $2.2 \times 10^{-5} \text{ cm}^2 \text{ s}^{-1}$ ) at  $25^\circ \text{C}$ ,  $\omega$  is the angular velocity of the disc and  $\nu$  is the kinematic viscosity of the solution ( $0.009 \text{ cm}^2 \text{ s}^{-1}$ ) at  $25^\circ \text{C}$ .<sup>3</sup> The plot of  $i^{-1}$  at multiple rotation rates vs. the inverse square root of the angular rotation rate ( $\omega^{-1/2}$ ) is linear. The number of electrons ( $n$ ) involved in the  $\text{O}_2$  reduction by a catalytic species may be calculated from the slope and rate of catalysis ( $k_{\text{cat}}$ ) from the intercept of this linear plot.

### 1.3.3. Partially Reduced Oxygen Species (PROS)

The Pt ring and the Au disc were both polished by alumina powder (grit sizes: 1  $\mu\text{m}$ , 0.3  $\mu\text{m}$ , and 0.05  $\mu\text{m}$ ) and electrochemically cleaned and inserted into the RRDE tip (Figure 3A) which was then mounted on the rotor and immersed into a cylindrical glass cell equipped with Ag/AgCl reference and Pt counter electrodes. The collection efficiency (CE) of the RRDE setup was measured in a 2 mM  $\text{K}_3\text{Fe}(\text{CN})_6$  and 0.1 M  $\text{KNO}_3$  solution at 10 mV/S scan rate and 300 rpm rotation speed. A  $20 \pm 2\%$  CE was generally recorded during these experiments (Figure 3B). The potential at which the ring was held during the collection experiments at pH 7 for detecting  $\text{H}_2\text{O}_2$  was obtained from literature.<sup>4</sup>

### 1.4. DFT Calculation

The geometry of all compounds is optimized in gradient corrected B3LYP Functional in unrestricted formalism using Gaussian 03 version C03. For hydroperoxide models, Fe, N and O atoms are optimised using 6-311G(d) basis set and 6-31G(d) for other all atoms. For the protonated hydroperoxide models all atoms are optimized with 6-311G(d) basis set in a Polarizable continuum model with water.<sup>5, 6</sup> An energy minimum is confirmed by performing frequency calculation on the fully optimized structure using the same basis set used for optimization to ensure no imaginary mode is present for all these compounds. The final energy calculations were performed using 6311+G(d) basis set on all atoms in PCM model using water as a solvent and convergence criterion of  $10^{-10}$  Hartree.<sup>7</sup> All the ferric-superoxide geometries have been optimised considering broken symmetry approximation using the same basis set as mentioned above and B3LYP functional for all atoms. To obtain the broken symmetry ground state of the Fe-O<sub>2</sub> adducts, first the triplet wave function was obtained from single point (SP) calculation. The broken symmetry singlet ground state could be obtained by performing a singlet calculation using the triplet wavefunction as an initial guess. The geometries were then optimized by vertically shifting the virtual orbitals using the Vshift keyword.

## 2. Synthesis:

### 2.1. 11-Imidazolyl Undecan-1-thiol (ImdC<sub>11</sub>SH)

11-Imidazolyl Undecan-1-thiol was synthesised according to the reported procedure (Scheme S1).<sup>8</sup>

<sup>1</sup>H NMR (500 MHz, CDCl<sub>3</sub>): 1.19 (m, 16H), 1.31 (m, 2H), 2.60 (t, 1H, J=7.5 Hz), 2.87 (t, 1H, J=7.5 Hz, 7.0 Hz), 4.03 (t, 2H, J=7.5 Hz, 7.0 Hz), 6.95 (s, 1H), 7.13 (s, 1H), 8.31 ppm (s, 1H).

ESI-MS (+ve ion mode, methanol): m/z = 254.03 (93%), [M]<sup>+</sup>; m/z = 285.98 (100%), [M+CH<sub>3</sub>OH]

**Scheme S1.** Schematic representation of the synthesis of ImdC<sub>11</sub>SH

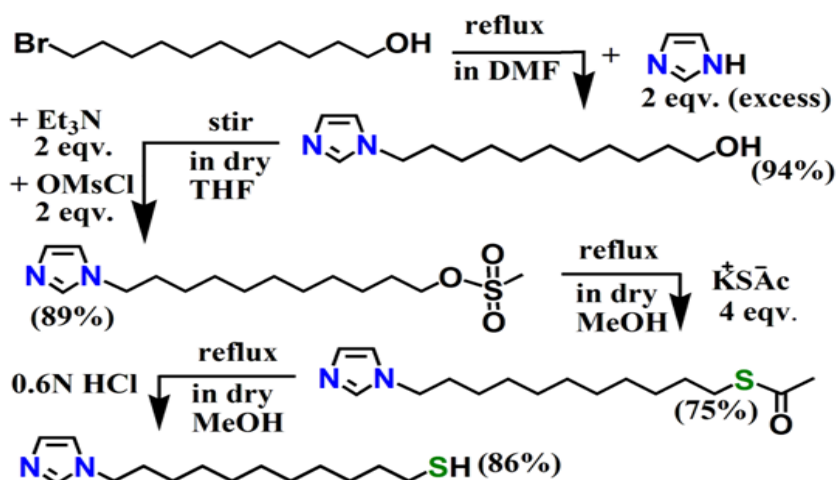

### 2.2. *o*-Monoguanidiniotetraphenyliron(III)-Porphyrin (Fe<sup>III</sup>Cl-MARG)

Fe-Marg was synthesised according to the reported procedure.<sup>9</sup>

Maximum yield: (62 mg, 90 ±2%)

MARG: Elemental analysis calculated (%) (C<sub>45</sub>H<sub>34</sub>N<sub>7</sub>Cl): C 76.31, H 4.84, N 13.84. Found: C 76.10, H 5.01, N 13.79. <sup>1</sup>H NMR (500 MHz, CDCl<sub>3</sub>, 25°C): δ, ppm = 8.98–9.12 (m, 8H), 8.540–8.55 (d, 1H), 8.41–8.46 (dd, 6H), 7.91–7.95 (m, 10H), 7.54–7.57 (m, 2H), 5.28 (s, 1H), 7.86 (s, 2H) – 2.37 (s, 2H)

ESI-MS (positive ion mode in ACN):  $m/z$  (%) = 672.09(100). Fe-MARG: Elemental analysis calculated. (%) ( $C_{45}H_{32}N_7Cl_2Fe$ ): C 67.77, H 4.04, N 12.29 Found: C 67.50, H 4.10, N 12.20.  $^1H$  NMR (500 MHz,  $CDCl_3$ , 25 °C):  $\delta$ , ppm = 78.80 ( $\beta$ -pyrrolic protons). UV-vis (ACN)  $\lambda_{max}$  = 415, 510, 588, 645 nm. UV-vis (5%v/v  $H_2O$ -ACN)  $\lambda_{max}$  = 415, 510, 567, 620 nm. ESI-MS (positive ion mode in ACN):  $m/z$  (%) = 725.156(100).

### 2.3. *o*-Monomethylguanidiniotetraphenyliron(III)-Porphyrin ( $Fe^{III}Cl$ -MeMARG)

**N-Methyl-N'-tert-butoxycarbonylthiourea:** A mixture of N-methylthiourea (1.69 g, 18.7 mmol) and hexane washed NaH (0.9 g, 22.5 mmol, 60% in mineral oil) was added in 250 mL of dry THF and was stirred for 15 min under Ar at 273K. Di-tert-butyl dicarbonate (4.25 g, 19.5 mmol) was added in a dropwise manner. An off-white slurry formed within 15 min, which was stirred for another 3 h at room temperature. The reaction mixture was quenched with 50 mL of saturated aqueous  $NaHCO_3$ . Excess THF was evaporated and extracted with ethyl acetate. The ethyl acetate layer was dried over  $Na_2SO_4$  and concentrated under vacuum producing a colourless slurry. The reaction mixture was separated on silica column with ethyl acetate/hexane (1: 5) to afford 2.11 g (59%) of desired product.  $^1H$  NMR ( $CDCl_3$ )  $\delta$  9.68 (1H, br s), 7.92 (1H, br s), 3.17 (3H, d), 1.48 (9H, s).

**Ligand MeMARG:** *o*-monoaminotetraphenyl porphyrin (629mg, 1mmol), N-Methyl-N'-tert-butoxycarbonylthiourea (330mg, 1.2mmol) and 3.5 equivalents of triethylamine (726  $\mu$ L, 5.25mmol) 1.2 equivalents of mercury (II) chloride (489 mg, 1.8mmol) were added in dimethylformamide (5 mL) at 273K in stirring condition. The temperature was maintained at 273K for 30 min and continued to stir for next 24hr at room temperature. The reaction mixture was filtered through Celite column to isolate the ligand from  $HgS$ . The celite column was rinsed with  $Et_2O$  and the organic layer was washed first with saturated ammonium chloride and then with brine (50 mL). The organic layer was dried over anhydrous  $MgSO_4$ . Dark purple coloured ligand MeMarg was collected by evaporating  $Et_2O$ . We avoided any chromatographic separation at this

stage. Ligand (2) was diluted with 5 mL MeOH followed by addition of 1 mL conc HCL and continued to stir for 12 hrs. The reaction mixture was neutralized by 33% v/v ammonia solution followed by evaporation of MeOH. The reaction mixture was separated with DCM from DCM-water bilayer. The organic layer was dried over Na<sub>2</sub>SO<sub>4</sub> and concentrated under vacuum.

**Fe-MeMARG:** To a solution of the MeMarg (67 mg, 0.08 mmol) in 20 mL of dry degassed THF, 2,4,6-collidine (25  $\mu$ L, 0.195 mmol) was added and was stirred for 10 min in a glovebox. FeBr<sub>2</sub> (70 mg, 0.328 mmol) dissolved in THF was added dropwise and was stirred for 20 h. The reaction mixture was worked up with 0.5 N HCl followed by the addition of DCM. The organic layer was washed with brine solution and collected. It was dried over anhydrous Na<sub>2</sub>SO<sub>4</sub> and purified by column chromatography with neutral alumina using 5% v/v MeOH-DCM mixture as eluent (Scheme S2). Yield: (61mg, 85 $\pm$ 2%)

MeMarg: <sup>1</sup>H NMR (400 MHz, CDCl<sub>3</sub>, 25°C):  $\delta$ , ppm = 8.85-8.89 (m, 8H), 8.544-8.554 (d, 1H), 8.137-8.269 (dd, 6H), 7.984-8.102 (m, 10H), 7.58-7.67 (m, 2H), 5.032 (s, 1H), 1.351 (s, 3H), -2.826 (s, 2H) ESI-MS (positive ion mode in ACN): m/z (%) = 686.28(100) (MH<sup>+</sup>). Fe-MeMarg: Elemental analysis calculated. (%) (C<sub>47</sub>H<sub>35</sub>N<sub>7</sub>Cl<sub>4</sub>Fe): C 63.04, H 3.94, N 10.95 Found: C 66.60 H 3.81 N 8.95. <sup>1</sup>H NMR (400 MHz, CDCl<sub>3</sub>, 25°C):  $\delta$ , ppm = 78.80 ( $\beta$ -pyrrolic protons). ESI-MS (positive ion mode in ACN): m/z (%) = 775.23(100) (MH<sup>+</sup>). UV-Vis (in ACN)  $\lambda_{\text{max}}$  = 416, 510, 574, 612

## 2.4. *o*-Monophenylguanidiniotetraphenyliron(III)-Porphyrin (Fe<sup>III</sup>Cl-PhMARG)

**N-phenyl-N'-tert-Butyloxycarbonylthiourea:** A mixture of N-phenylthiourea (1.75g, 23.03 mmol) and hexane washed NaH (4.14 g, 103.6 mmol, 60% in mineral oil), was added in THF (250 mL) and stirred for 15 minutes. After that di-tert-butyl dicarbonate (11.04 g, 50.66 mmol) was added dropwise over the period of 15 minutes. An off-white slurry formed within 15 min, which was stirred for another 12 h at room temperature. The reaction mixture was quenched with 50 mL of saturated aqueous NaHCO<sub>3</sub>. Excess THF was evaporated and extracted with ethyl acetate. The ethyl acetate layer was dried over Na<sub>2</sub>SO<sub>4</sub> and concentrated under vacuum producing a colourless slurry. The reaction mixture was separated on silica column with ethyl acetate/hexane

(1: 7).  $^1\text{H}$  NMR (400 MHz,  $\text{CDCl}_3$ ):  $\delta$  11.55 (br s, 1H), 8.24 (br s, 1H), 7.66 (d, 2H), 7.42 (dd, 2H), 7.28 (t, 1H CH), 1.55 (s, 9H).

**Ligand PhMARG:** o-monoaminotetraphenyl porphyrin (629mg, 1mmol), N-Methyl-N'-tert-butoxycarbonylthiourea (330mg, 1.2mmol) and 3.5 equivalents of triethylamine (726  $\mu\text{L}$ , 5.25mmol) 1.2 equivalents of mercury (II) chloride (489 mg, 1.8mmol) were added in dimethylformamide (5 mL) at 273K in stirring condition. The temperature was maintained at 273K for 30 min and continued to stir for next 24hr at room temperature. The reaction mixture was filtered through Celite column to isolate the ligand from  $\text{HgS}$ . The celite column was rinsed with  $\text{Et}_2\text{O}$  and the organic layer was washed first with saturated ammonium chloride and then with brine (50 mL). The organic layer was dried over anhydrous  $\text{MgSO}_4$ . Dark purple coloured ligand MeMarg was collected by evaporating  $\text{Et}_2\text{O}$ . We avoided any chromatographic separation at this stage. Ligand (2) was diluted with 5mL MeOH followed by addition of 1mL conc HCL and continued to stir for 12hrs. The reaction mixture was neutralized by 33% v/v ammonia solution followed by evaporation of MeOH. The reaction mixture was separated with DCM from DCM-water bilayer. The organic layer was dried over  $\text{Na}_2\text{SO}_4$  and concentrated under vacuum.

**Fe-PhMARG:** To a solution of the PhMarg (71 mg, 0.08 mmol) in 20 mL of dry degassed THF, 2,4,6-collidine (25  $\mu\text{L}$ , 0.195 mmol) was added and was stirred for 10 min in a glovebox.  $\text{FeBr}_2$  (70 mg, 0.328 mmol) dissolved in THF was added dropwise and was stirred for 20 h. The reaction mixture was worked up with 0.5 N HCl followed by the addition of DCM. The organic layer was washed with brine solution and collected. It was dried over anhydrous  $\text{Na}_2\text{SO}_4$  and purified by column chromatography with neutral alumina using 5% v/v MeOH–DCM mixture as eluent (Scheme S2). Yield: (67mg, 88 $\pm$ 2%)

PhMarg:  $^1\text{H}$  NMR (400 MHz,  $\text{CDCl}_3$ , 25 $^\circ\text{C}$ ):  $\delta$ , ppm = 8.925-9.049 (m, 8H), 8.341-8.387 (d, 1H), 8.17-8.24 (dd, 6H), 7.632-7.847 (m, 10H), 7.450-7.463 (m, 2H), 6.415 (s, 1H), 6.265 (s, 2H), 5.814 (s, 2H) 5.295 (s, 1H), -2.539 (s, 2H) ESI-MS (positive ion mode in ACN):  $m/z$  (%) = 748.29(100). ( $\text{MH}^+$ ) Fe-PhMarg: Elemental analysis calculated. (%) ( $\text{C}_{51}\text{H}_{36}\text{N}_7\text{ClFe}$ ): C 73.08, H 4.33, N 11.70 Found: C 72.07 H 3.68 N 10.91.  $^1\text{H}$  NMR (400 MHz,  $\text{CDCl}_3$ , 25 $^\circ\text{C}$ ):  $\delta$ , ppm = 78.80 ( $\beta$ -



pyrrolic protons). ESI-MS (positive ion mode in ACN):  $m/z$  (%) = 837.25(100) ( $MH^+$ ). UV-Vis (in ACN)  $\lambda_{max}$  = 411, 515, 568, 612

**Scheme S2.** Synthetic scheme of the desired complexes **Fe-MeMARG** and **Fe-PhMARG** (R= Me, Ph accordingly)

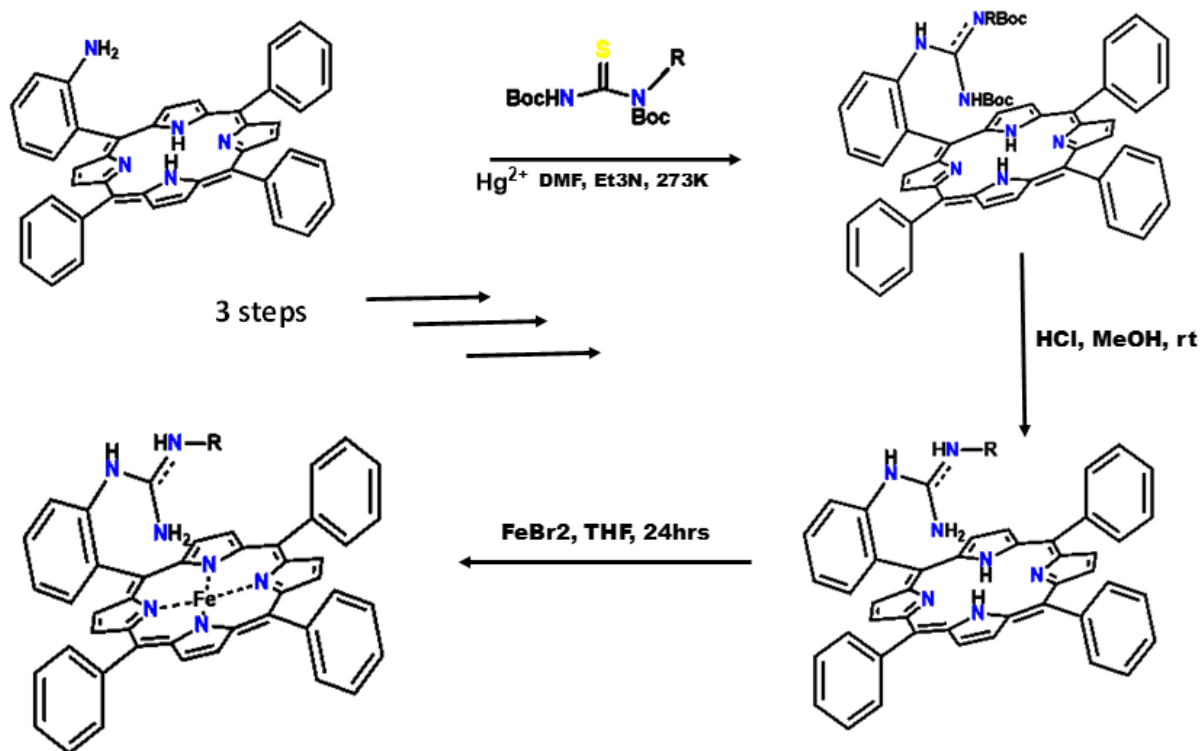

## 2.5. Fe-Marg-N-Melmd

Fe-Marg was synthesised according to the reported procedure.<sup>9</sup> At first 20 mg of Fe-Marg was dissolved in DCM. To that solution almost 5 eq. of N-Methylimidazole solution (10  $\mu$ L) was added. The mixture was then sonicated. To the mixture excess pentane was added. The mixture was then centrifuged for 15 mins. and the extract was collected. To the extract a mixture of pentane and DCM was added. The mixture was again centrifuged for some time. Then a red extract was obtained which was monitored through UV-Vis spectra to confirm the formation of Fe-Marg-N-Melmd (Fig. S2).

Fe-Marg-N-MeImd:  $^1\text{H}$  NMR (400 MHz,  $\text{CDCl}_3$ ,  $25^\circ\text{C}$ ):  $\delta$ , ppm = 81.405 ( $\beta$ -pyrrolic protons). UV-Vis (in ACN)  $\lambda_{\text{max}}$  = 324, 413, 558

### 3. Construction of the Electrodes

#### 3.1 Formation of mixed SAM (ImdC<sub>11</sub>SH SAM)

Au wafers and discs were cleaned electrochemically by sweeping several times between 1.5 V to  $-0.3$  V in  $0.5$  M  $\text{H}_2\text{SO}_4$ .  $10\text{ mL}$   $0.4$  mM SAM solution in ethanol was prepared using  $0.2$  mole fraction of the linker ImdC<sub>11</sub>SH and C<sub>8</sub>SH was used as the diluent. Au wafers and discs were rinsed with milli-q water, ethanol, purged with  $\text{N}_2$  gas and immersed in the depositing solution for 48 hours.

Similarly,  $10$  mL  $0.4\text{ mM}$  C<sub>8</sub>SH and C<sub>16</sub>SH SAM was prepared with the diluent C<sub>8</sub>SH and C<sub>16</sub>SH.

#### 3.2. Attachment of the Catalysts on the ImdC<sub>11</sub>SH SAM

Au wafers and discs were taken out before experiments and rinsed with ethanol followed by milli-q water and then dried with  $\text{N}_2$  gas. The wafers were then inserted into a Plate Material Evaluating Cell (ALS Japan), and the discs were mounted on a platinum ring disc assembly (Pine Instruments, U.S.A.). Solutions of the catalysts were prepared in chloroform. Chloroform solution of the catalyst was drop casted over SAM functionalised Au discs and wafers and kept

for 2 hours. After the time the surfaces were thoroughly rinsed with chloroform, ethanol, and triple distilled water before the electrochemical experiments. This is the way to form bio inspired electrode (scheme 2).

**Scheme S3.** Formation of bio-inspired electrode using mixed SAM ImdC<sub>11</sub>SH and catalysts solution.

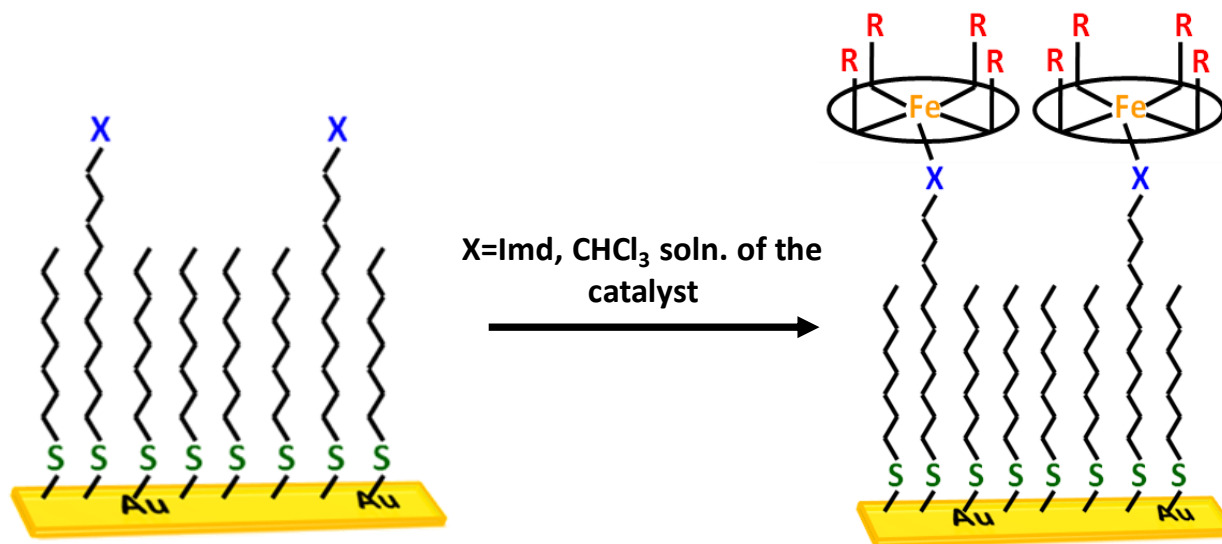

### 3.3. Physioadsorption of the catalyst on EPG, C<sub>8</sub>SH, C<sub>16</sub>SH SAM covered Au electrodes

A 50  $\mu$ L portion of catalyst from a 1 mM solution of the respective catalysts in chloroform (CHCl<sub>3</sub>) is deposited on a freshly cleaned EPG electrode, or on Au discs taken out from C<sub>8</sub>SH and C<sub>16</sub>SH SAM solution and mounted on a RDE setup. After the evaporation of the solvent, the surface is thoroughly dried with N<sub>2</sub> gas and sonicated in ethanol. Finally, before using it for electrochemical experiments, the modified electrodes are washed with milli-q water.

## 4. Spectral data.

### 4.1.1. ESI-MS of free ligand MARG

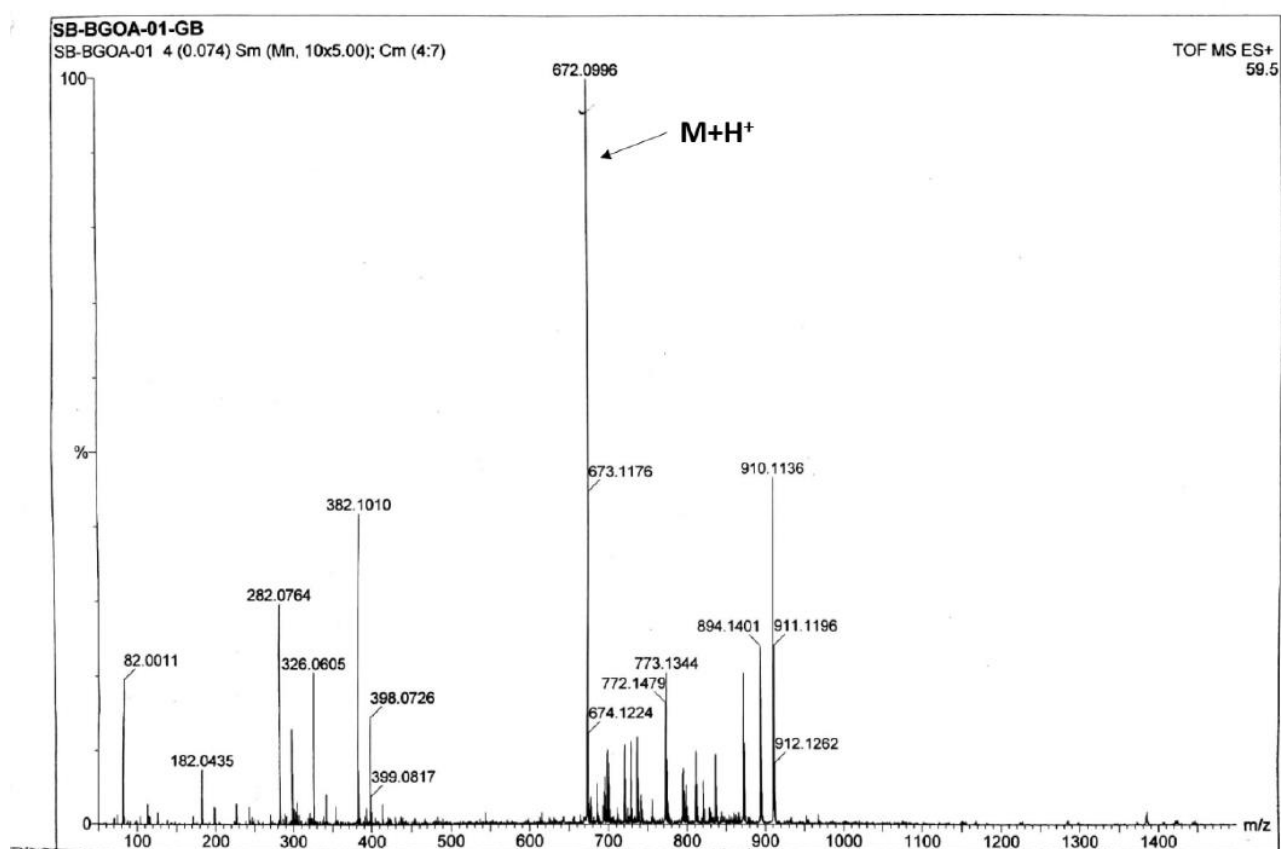

#### 4.1.2. ESI-MS of free ligand MeMARG

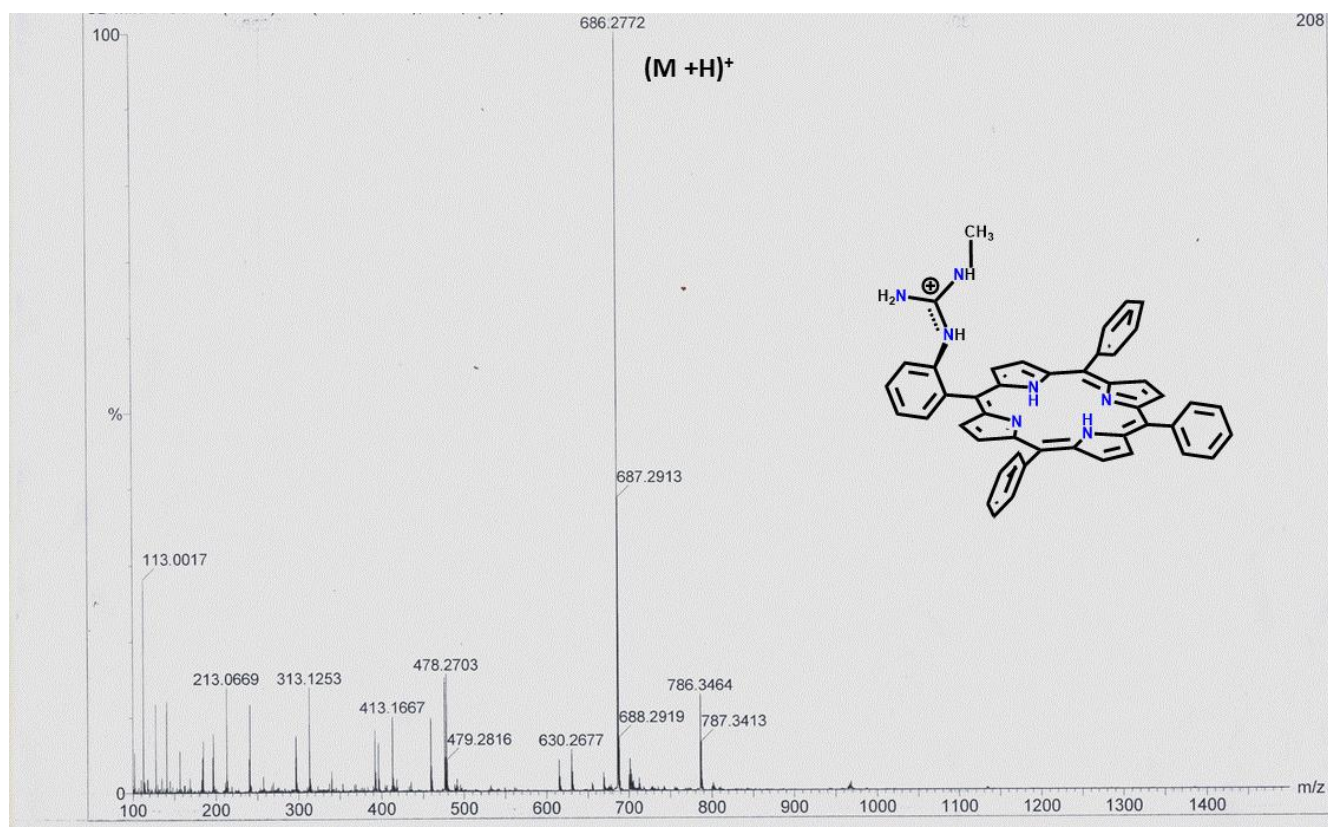

### 4.1.3. ESI-MS of free ligand PhMARG

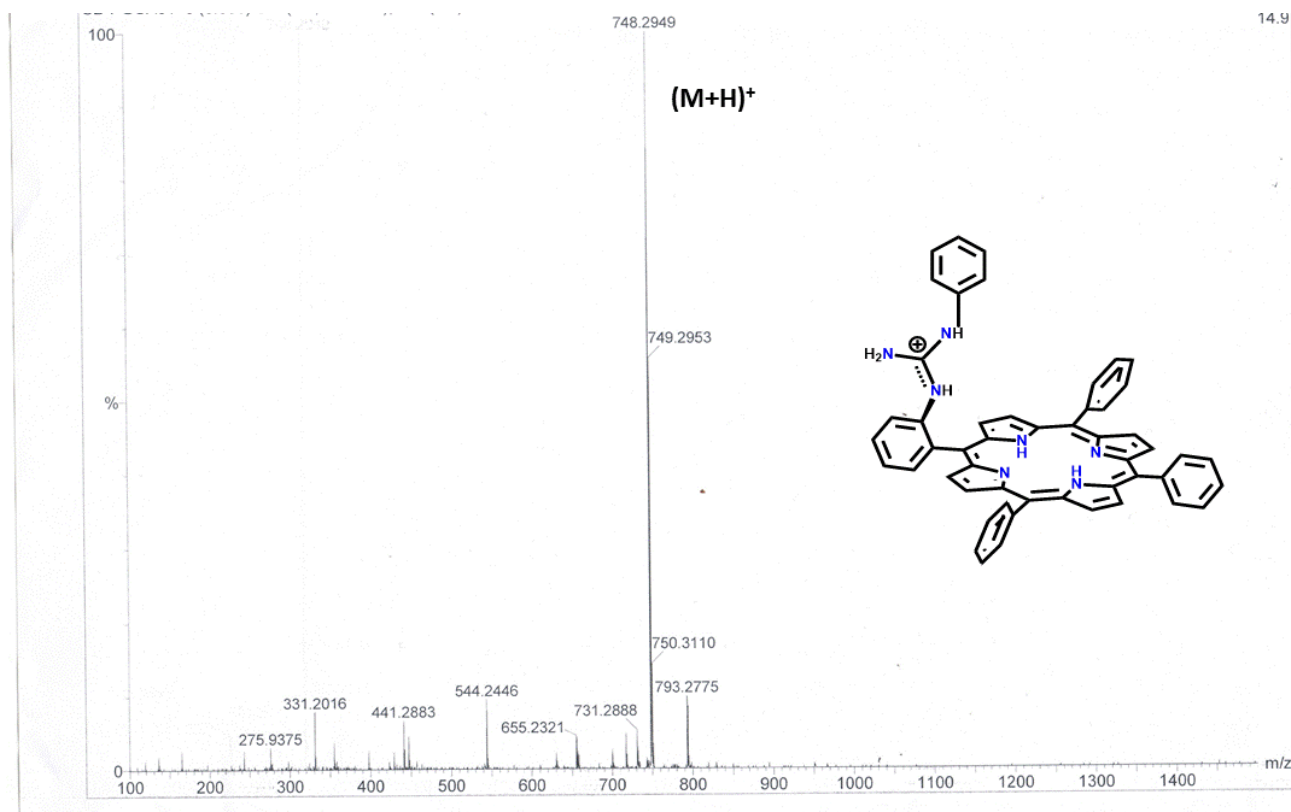

#### 4.1.4. ESI-MS of Fe-MARG

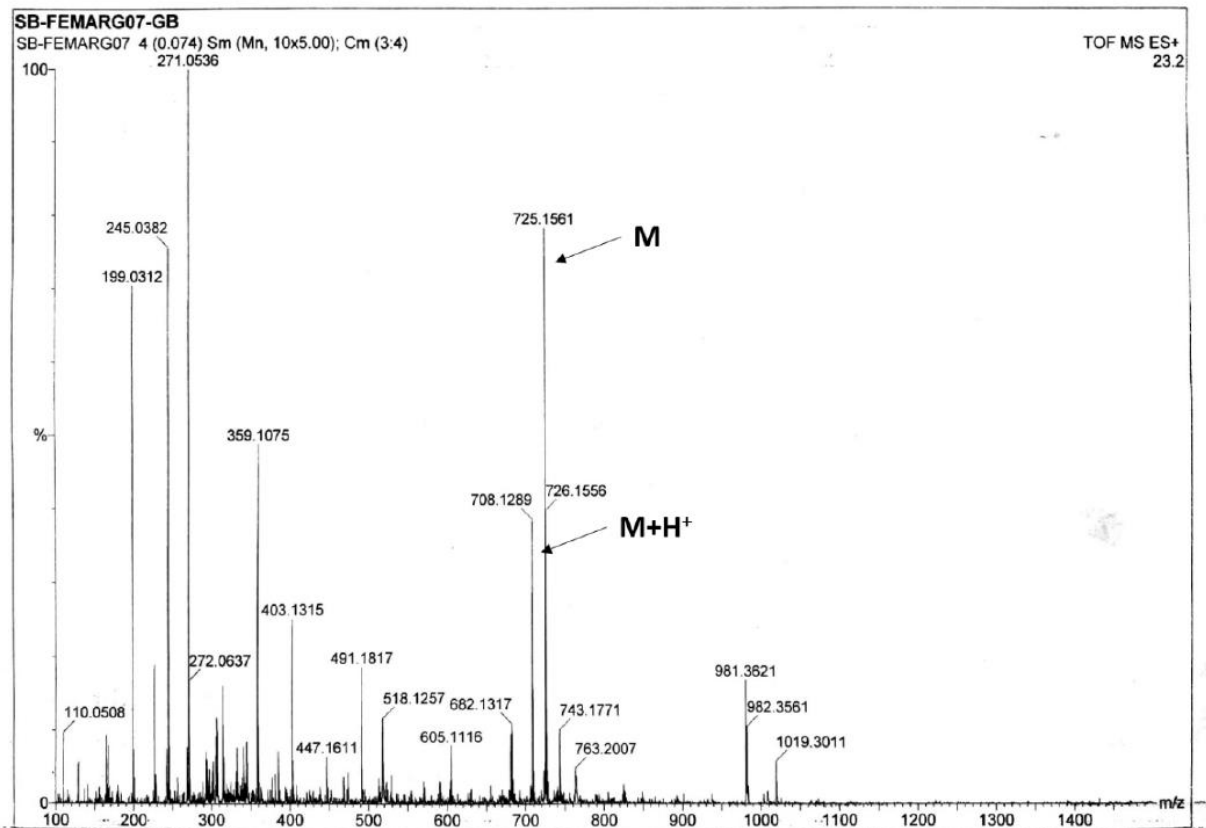

#### 4.1.5. ESI-MS of Fe-MeMARG

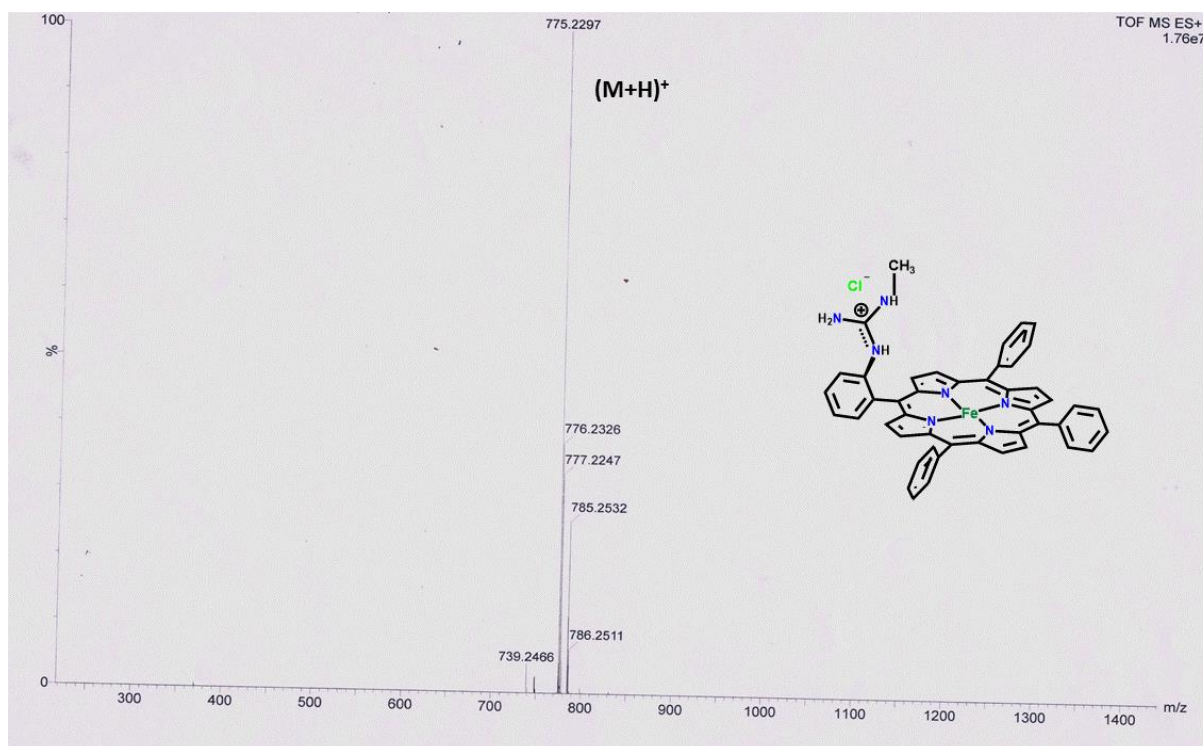



#### 4.1.6. ESI-MS of Fe-PhMARG

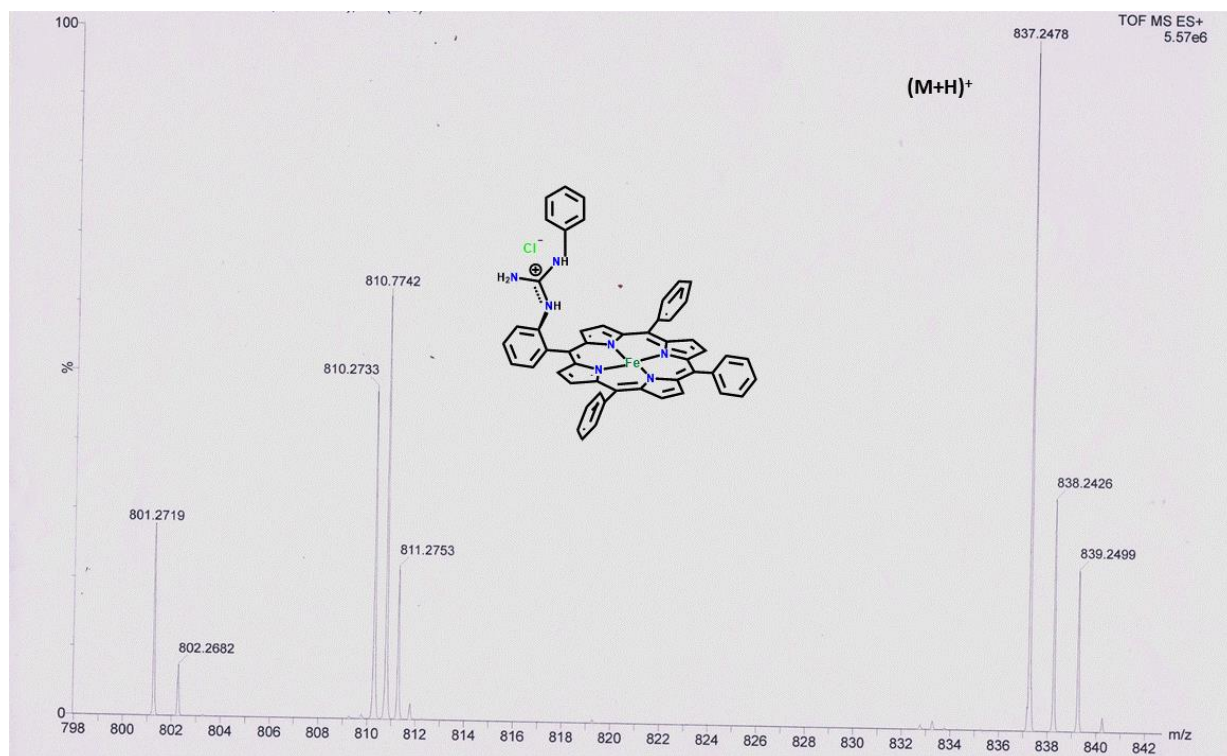

#### 4.2.1. $^1\text{H}$ NMR ( $\text{CDCl}_3$ , 400 MHz) of free ligand MeMARG

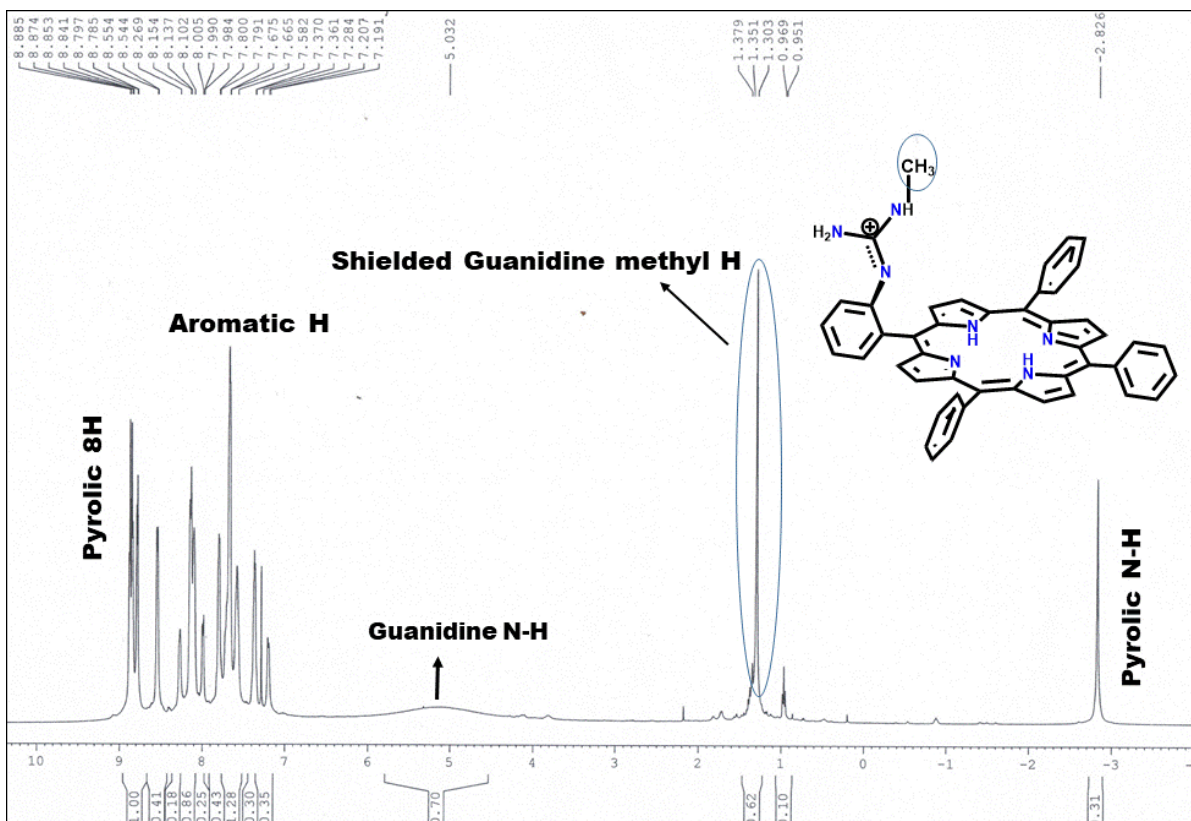

#### 4.2.2. <sup>1</sup>H NMR (CDCl<sub>3</sub>, 400 MHz) of free ligand PhMARG

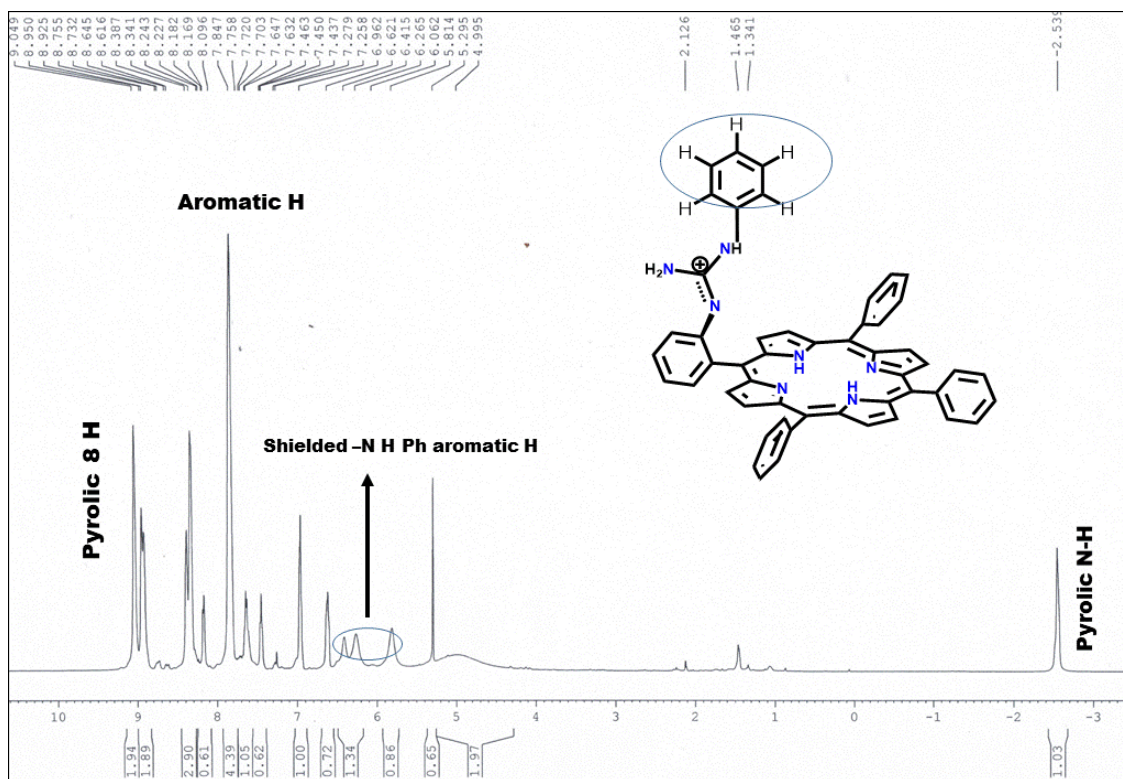

### 4.2.3. <sup>1</sup>H NMR (CDCl<sub>3</sub>, 400 MHz) of Fe-MARG-N-Melmd

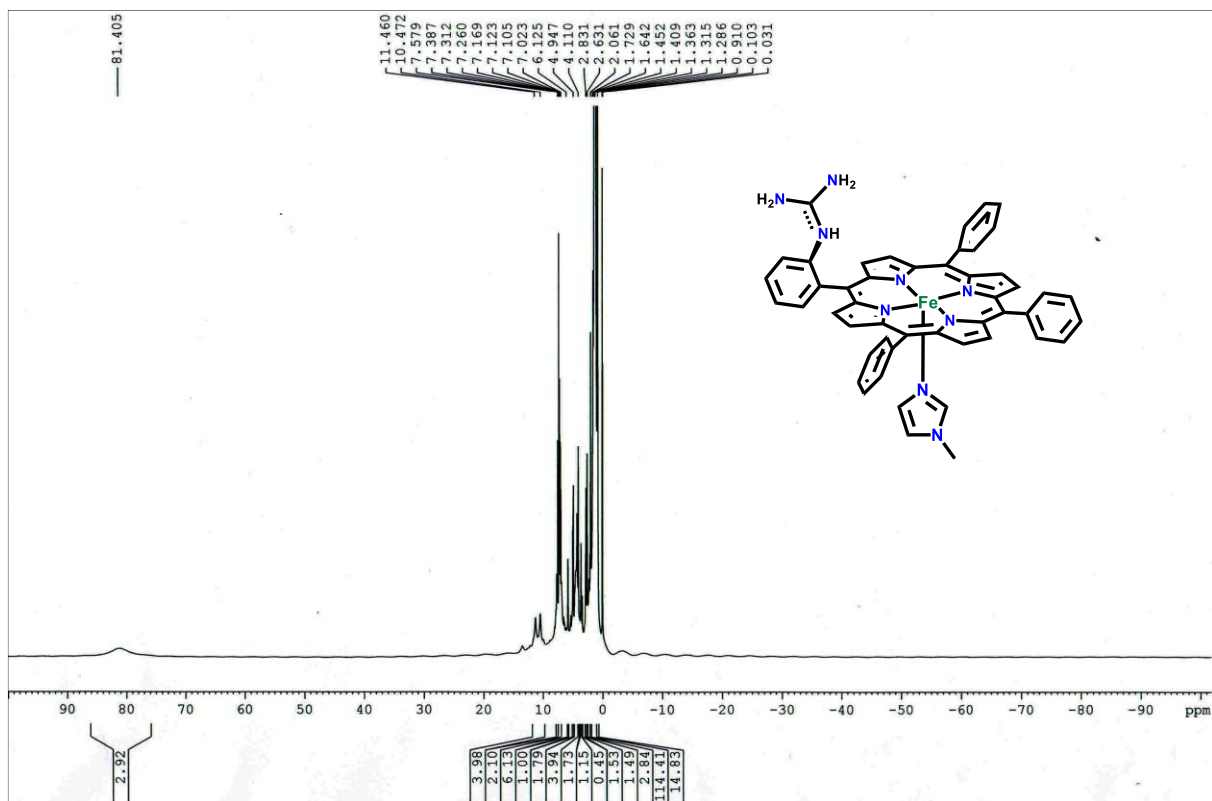

### 4.3. UV-Vis absorption spectra

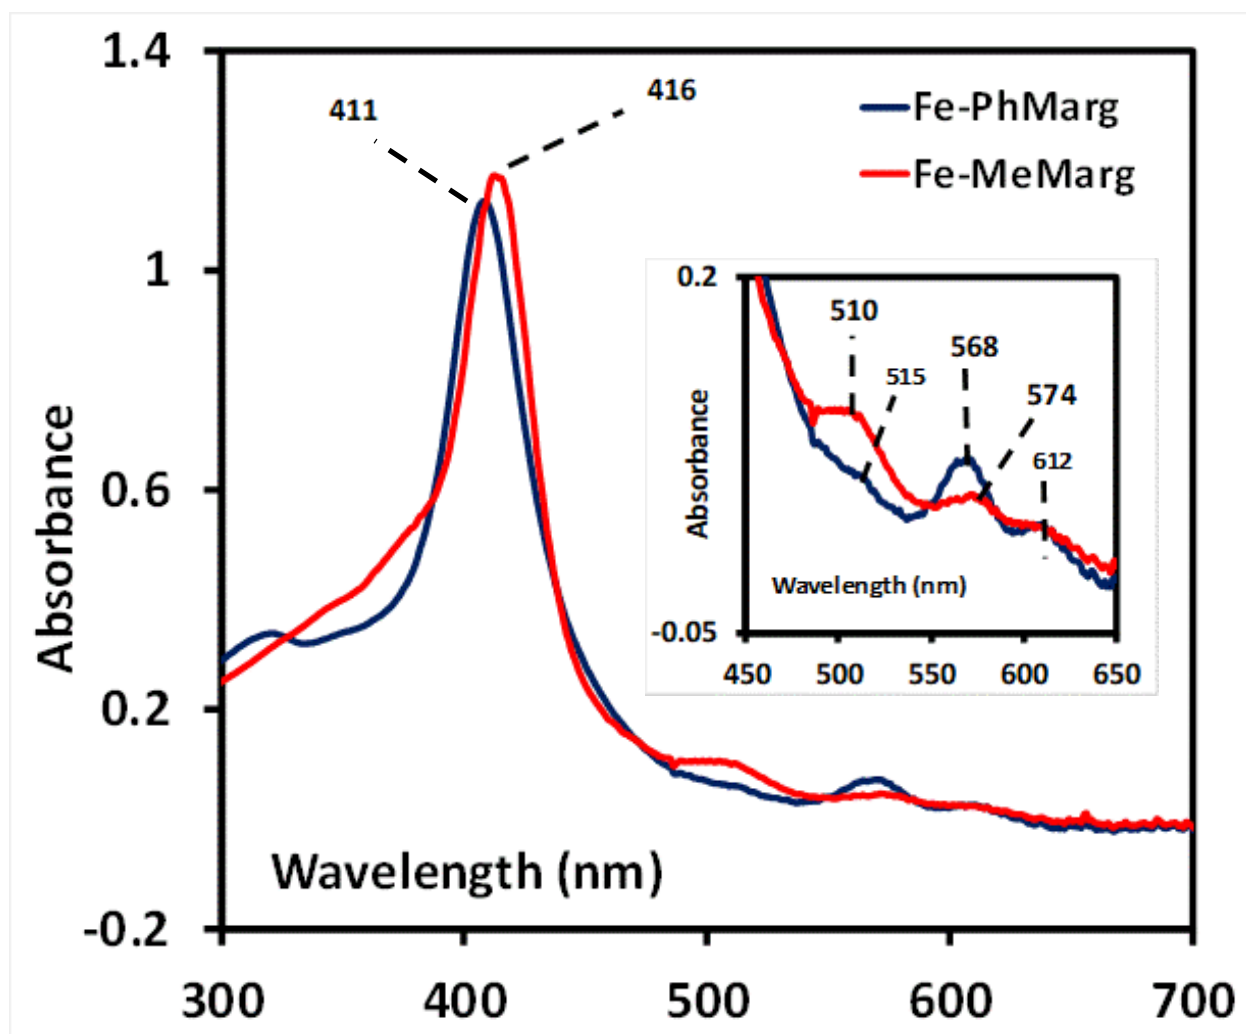

**Figure S1.** Absorption spectra in the UV-Visible region for  $\text{Fe}^{\text{III}}\text{Cl-MeMarg}$  (red) and  $\text{Fe}^{\text{III}}\text{Cl-PhMarg}$  (blue) complex in acetonitrile solvent. Inset shows the Q-band region of the complexes.

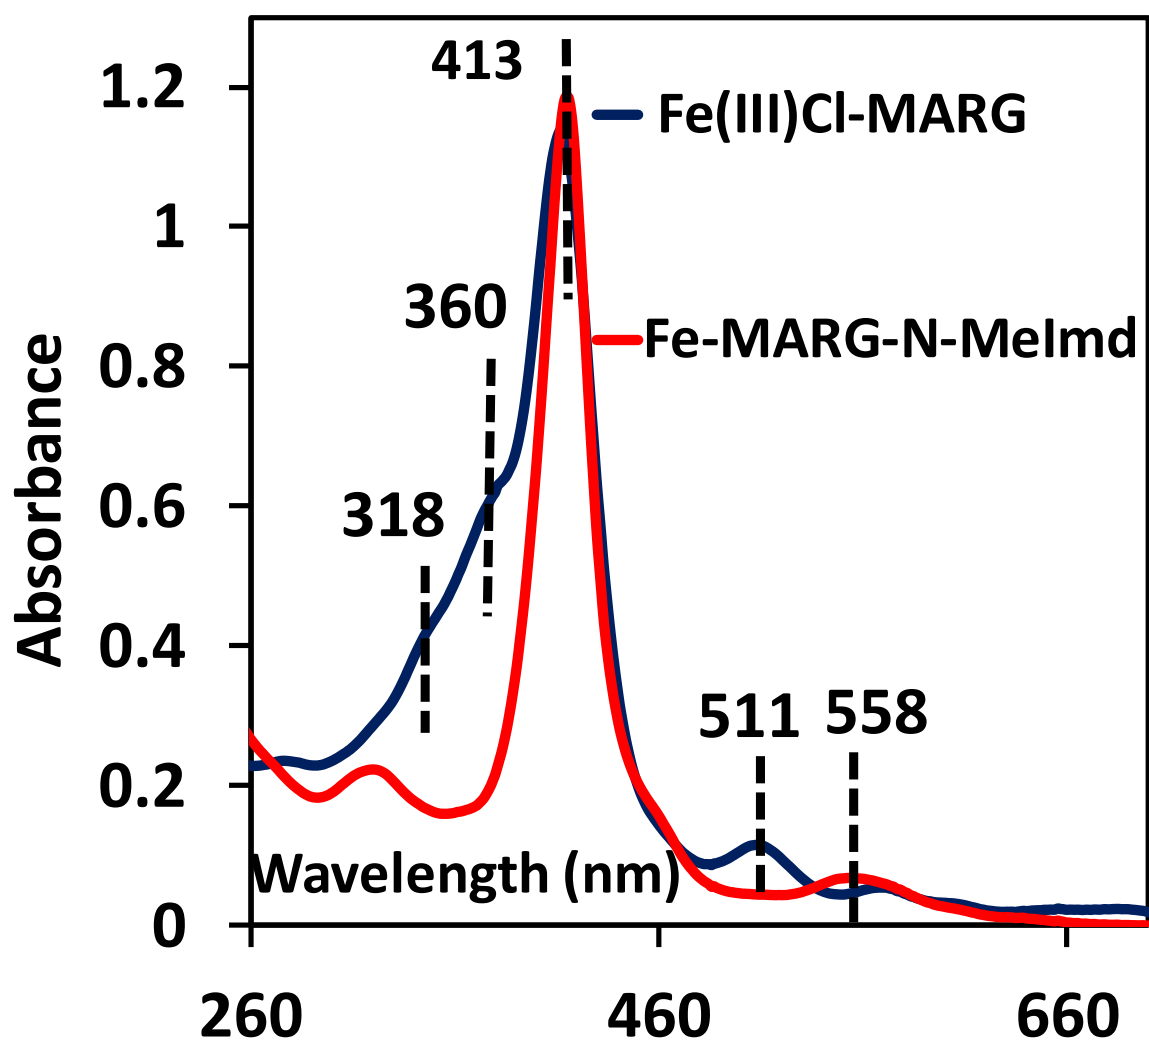

**Figure S2.** Absorption spectra in the UV-Visible region for Fe-Marg-N-Melmd (red) and Fe<sup>III</sup>Cl-Marg (blue) complex in acetonitrile solvent.

#### 4.4. Resonance Raman Spectra

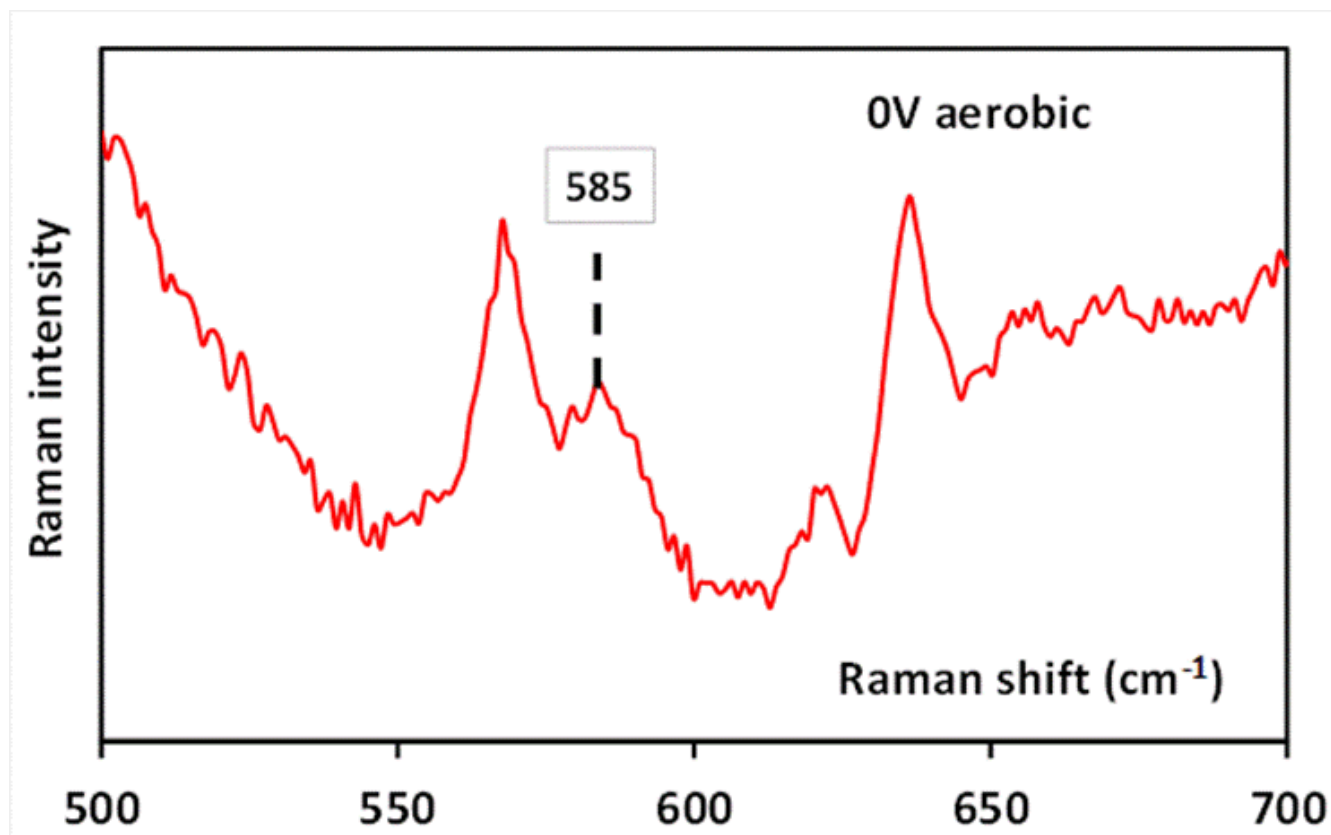

**Figure S3.** The metal-ligand region of the SERRS data of Fe<sup>III</sup>-Cl-MARG physisorbed on C8SH SAM modified Ag electrode at pH7 buffer with a constant rotation of 200 rpm.

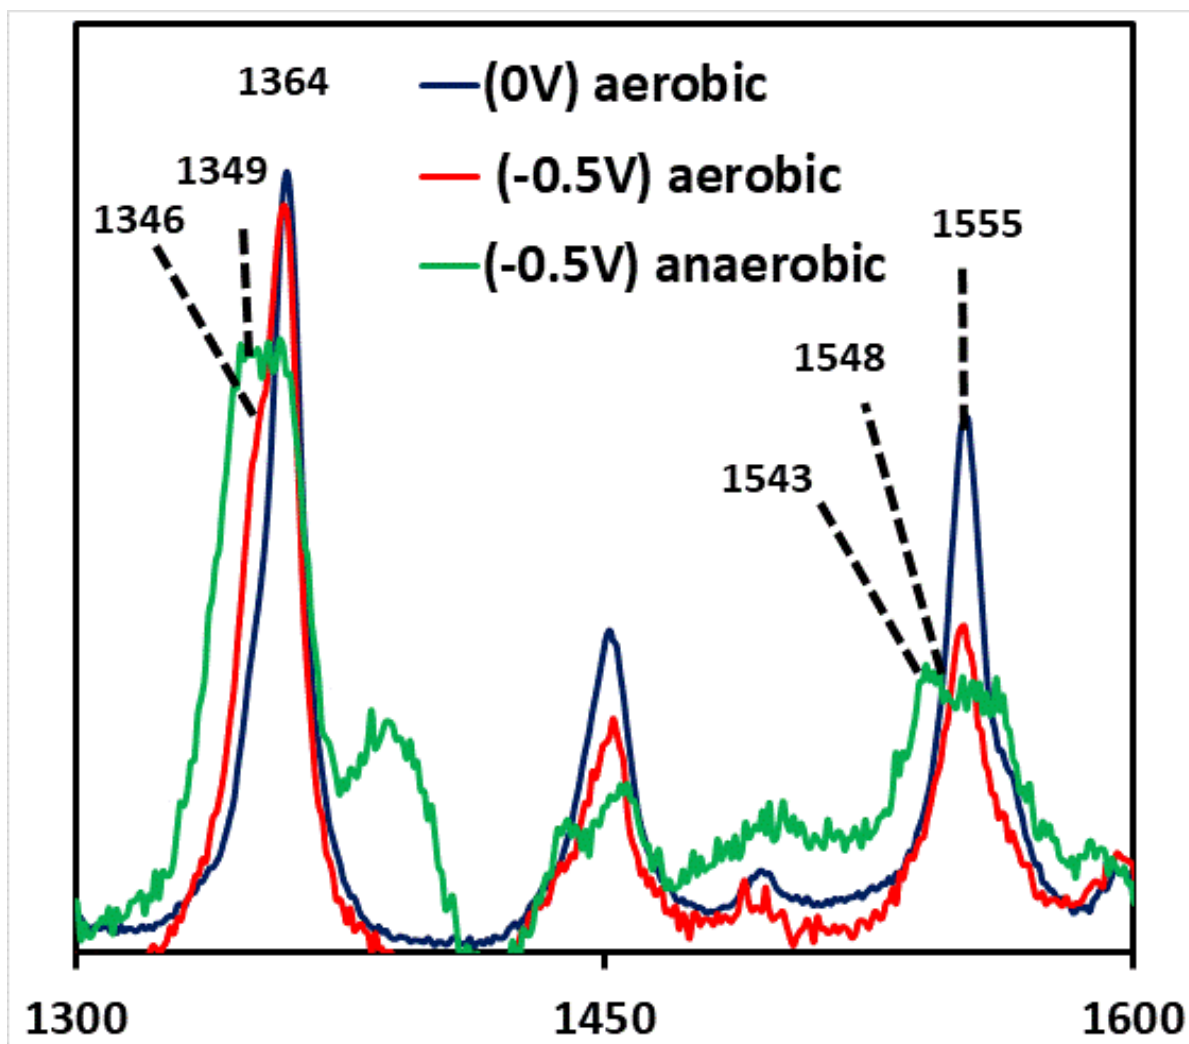

**Fig.S4.** SERRS-RDE data of Fe<sup>III</sup>-Cl-MARG physisorbed on a C<sub>8</sub>SH modified Ag disc, under oxidising potential (0V, blue) and reducing potential (-0.5V, red) in pH7 phosphate buffer under aerobic condition and at reducing potential in pH7 phosphate buffer under anaerobic condition (green) at a constant rotation rate 200 rpm



## 5. Electrochemical Data

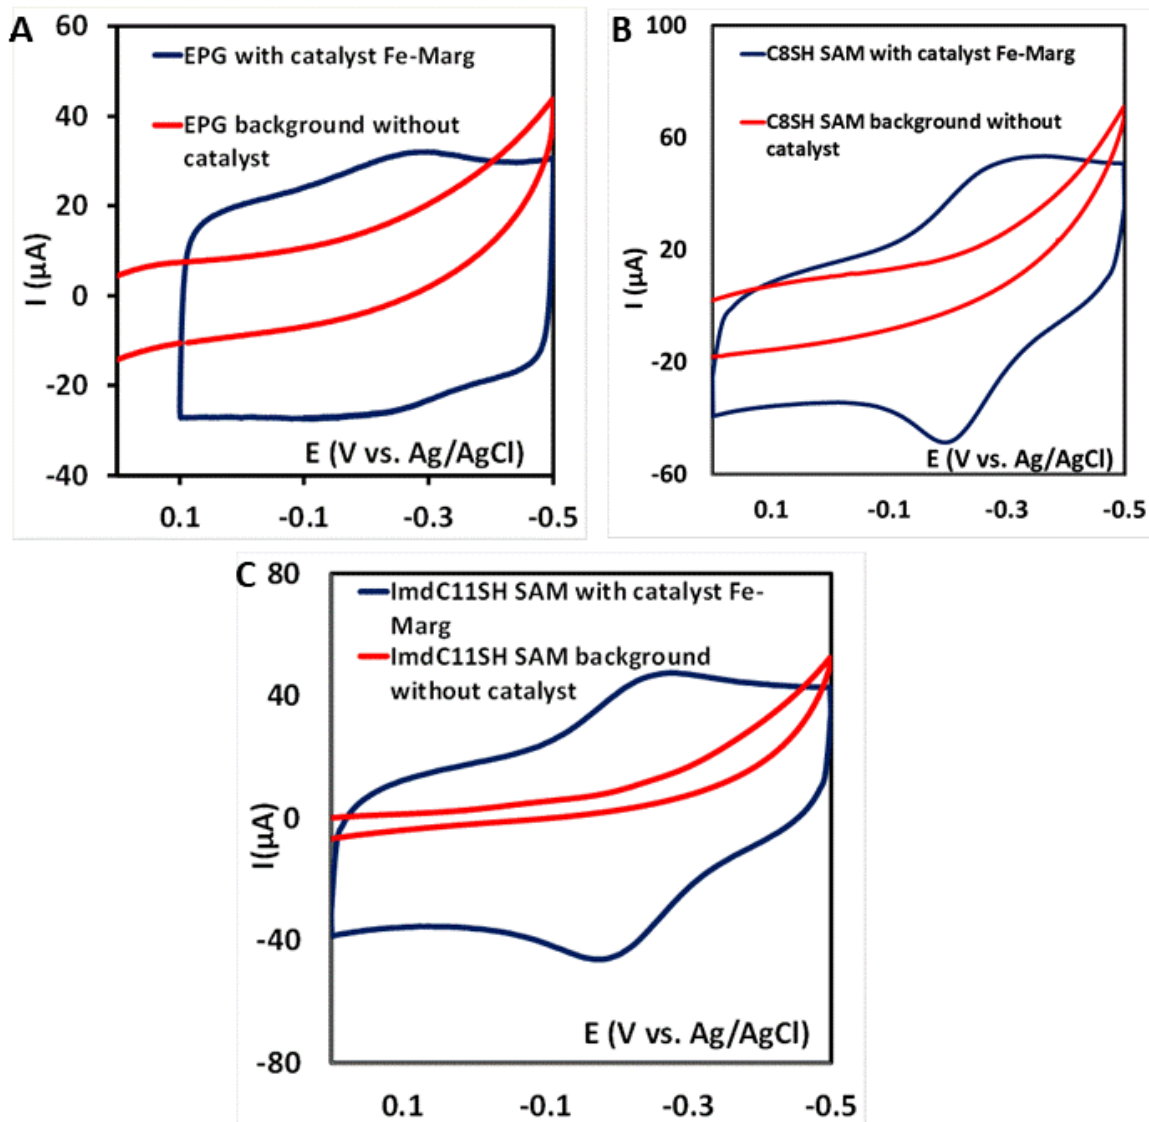

**Figure S5.** CV overlay of  $\text{Fe}^{\text{III}}\text{Cl-MARG}$  complex under heterogeneous condition in PH 7 buffer immobilizing the catalysts on A) EPG, B) C<sub>8</sub>SH SAM covered Au electrode C) ImdC<sub>11</sub>SH SAM covered Au electrode along with their background without loading catalysts (blue line) using Pt counter electrode and Ag/AgCl (saturated KCl) as reference electrode.

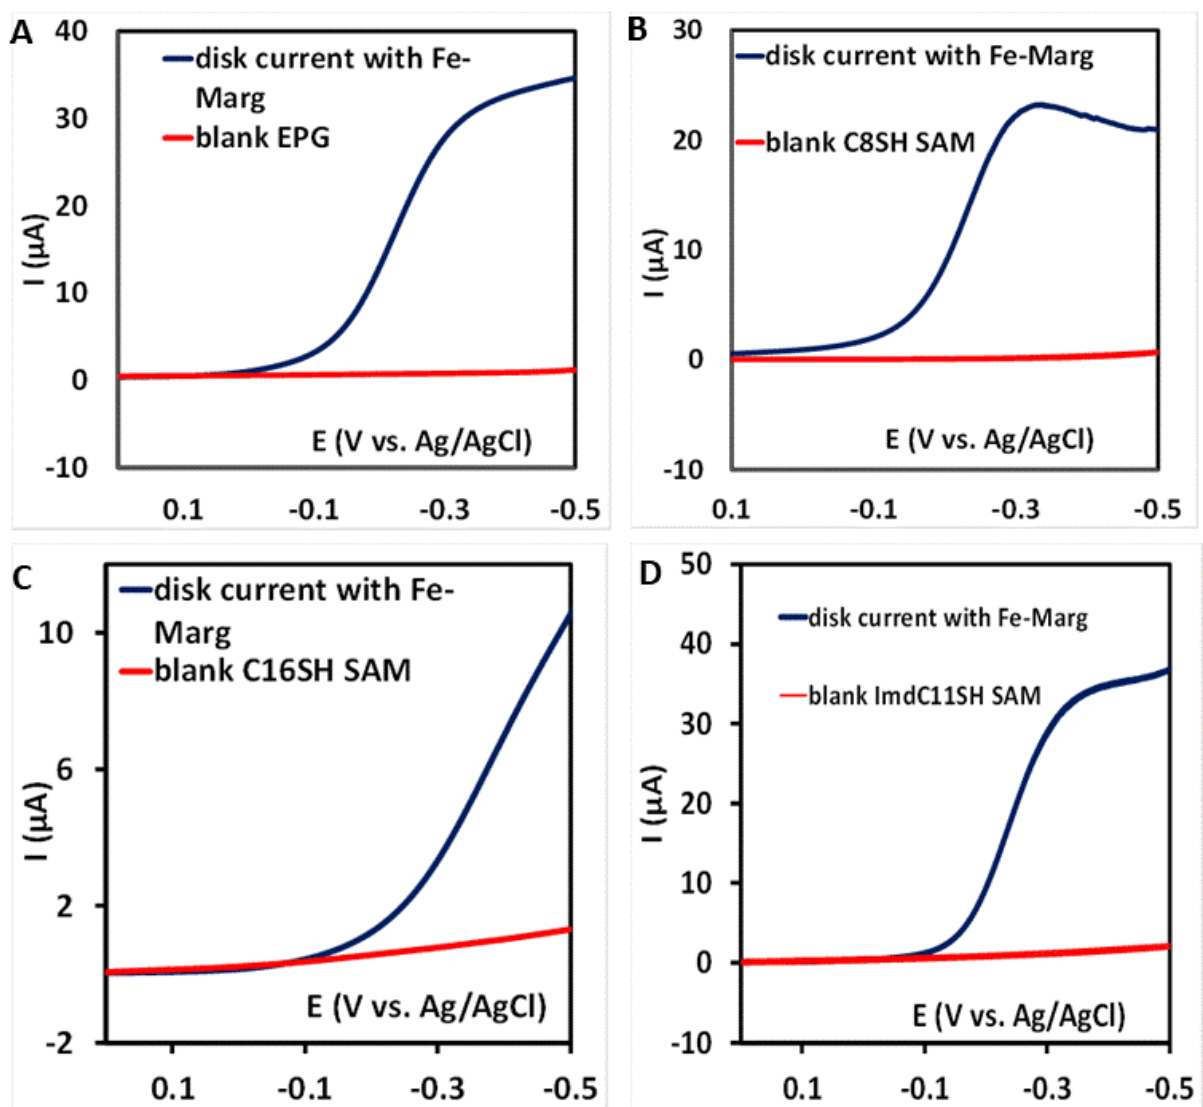

**Figure S6.** Disk current of complex  $\text{Fe}^{\text{III}}\text{-Cl-MARG}$  immobilized on A) EPG B) C<sub>8</sub>SH SAM C) C<sub>16</sub>SH SAM D) ImdC<sub>11</sub>SH SAM along with their corresponding background of the blank electrodes in aerobic PH 7 buffer at 10 mV/s scan rate using 300 rpm rotation, Pt as counter electrode and Ag/AgCl in sat. KCl reference electrode.

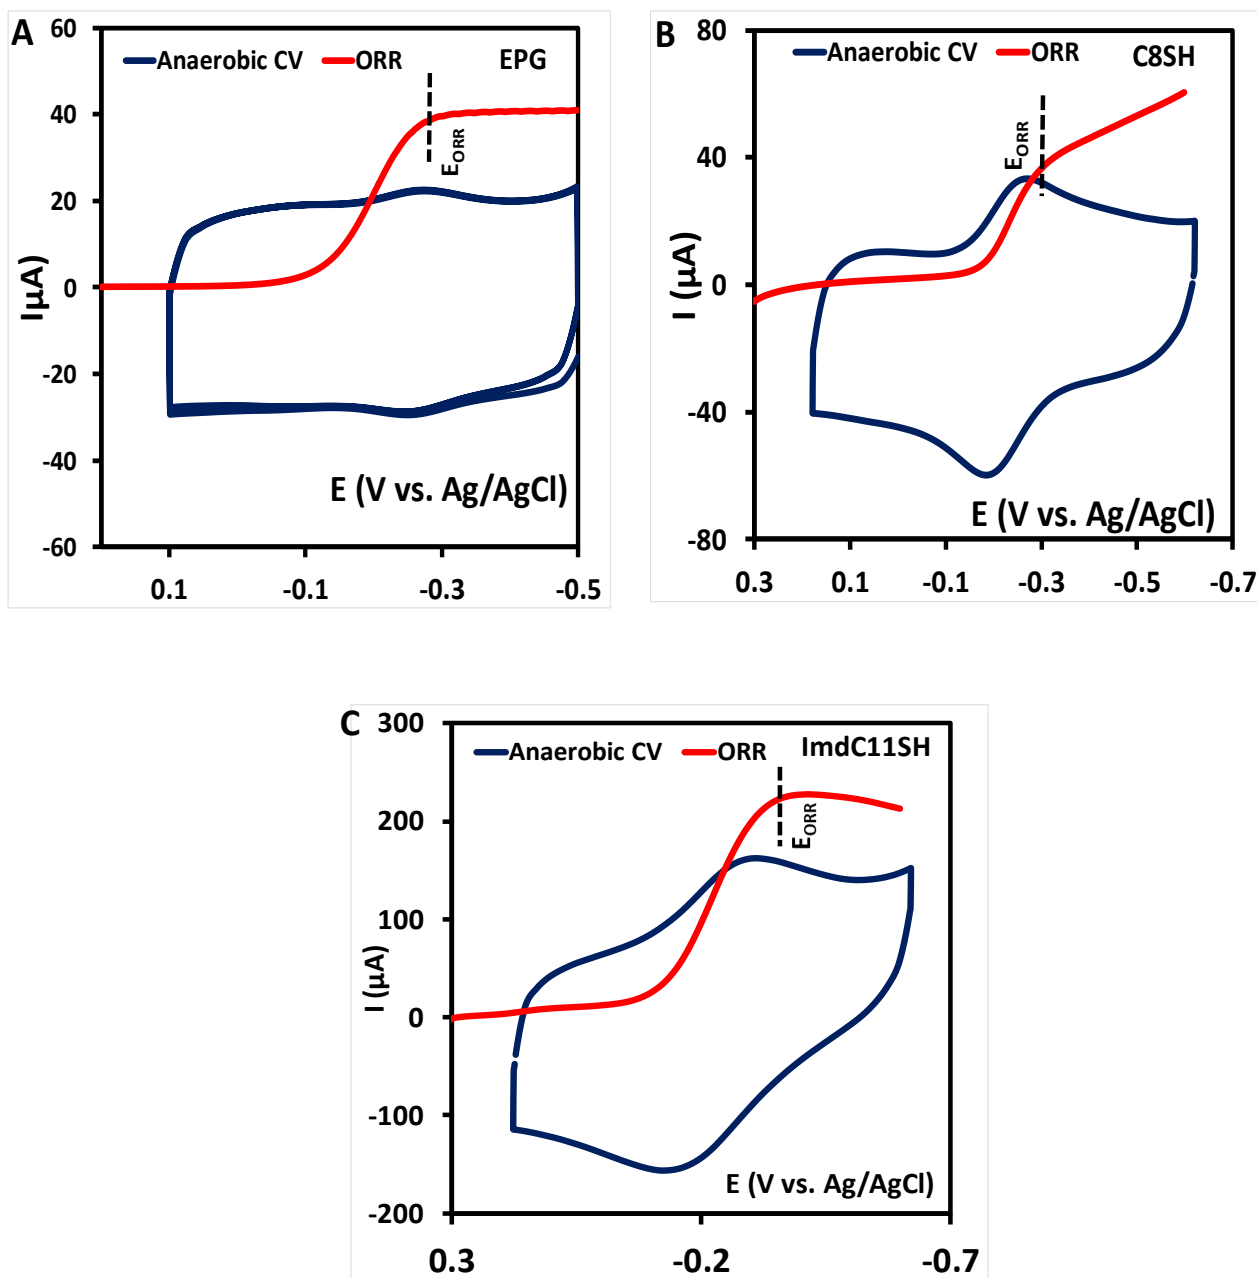

**Figure S7.** Comparison of Anaerobic CV data with the LSV of ORR for  $\text{Fe}^{\text{III}}\text{Cl-MeMARG}$  complex in (A) EPG, (B)  $\text{C}_8\text{SH}$  SAM and (C)  $\text{ImdC}_{11}\text{SH}$  SAM modified Au electrode in pH7 phosphate buffer with  $\text{KPF}_6$  supporting electrolyte using Pt as counter electrode and Ag/AgCl in sat. KCl reference electrode. CV data was collected at  $1 \text{ V s}^{-1}$  scan rate and LSV of ORR data was collected at  $50 \text{ mV s}^{-1}$

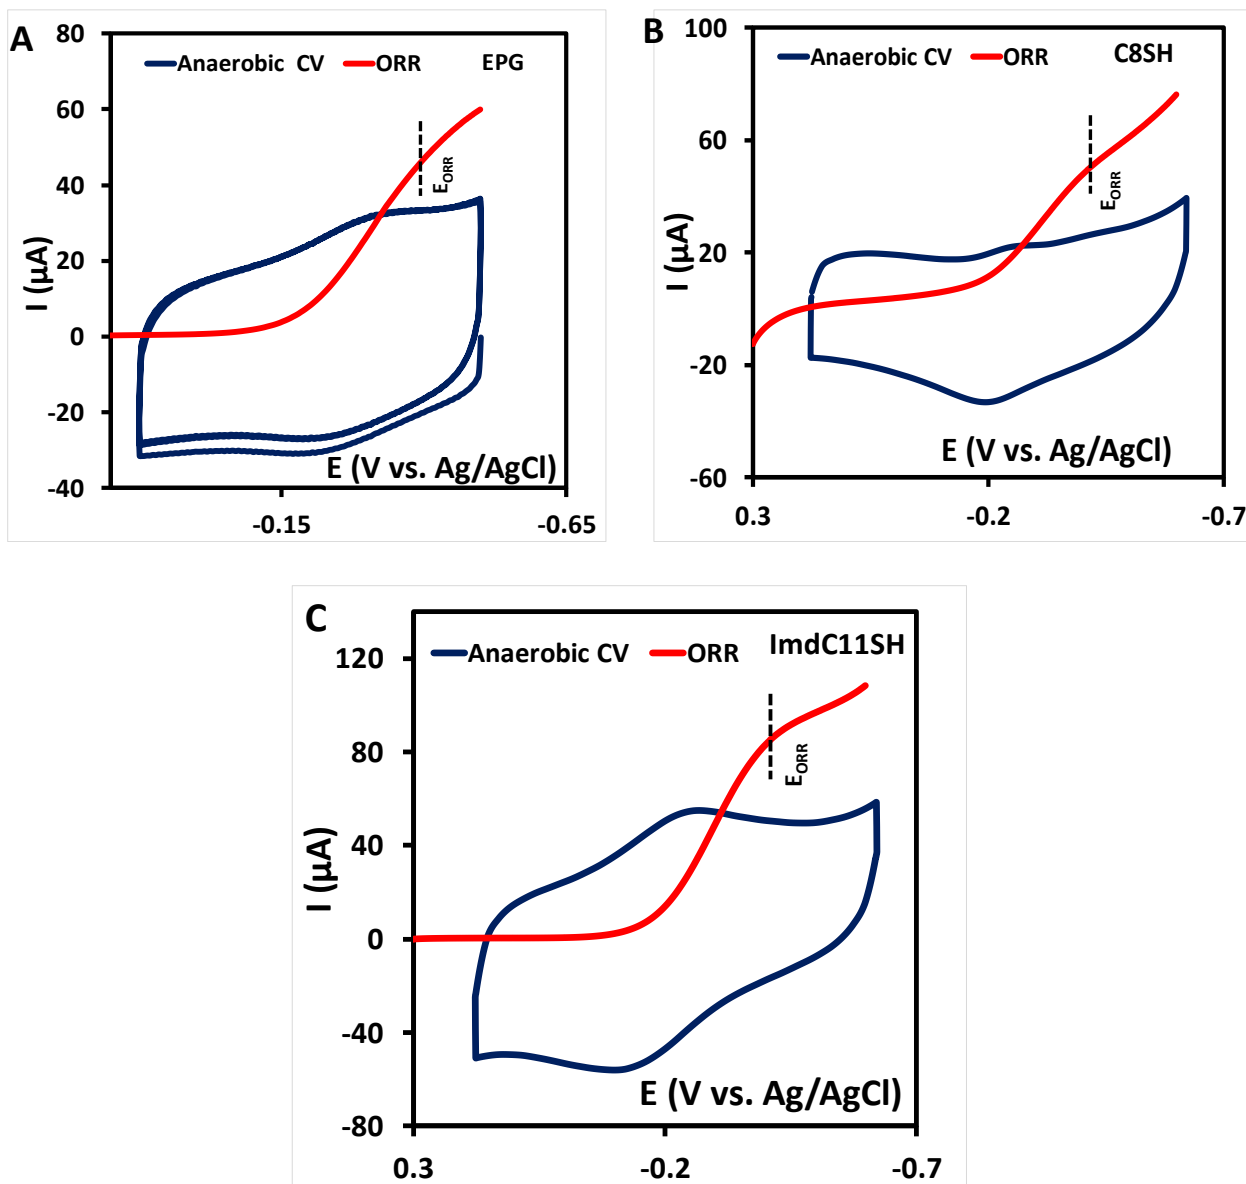

**Figure. S8.** Comparison of Anaerobic CV data with the LSV of ORR for  $\text{Fe}^{\text{III}}\text{Cl-PhMARG}$  complex on (A) EPG, (B)  $\text{C}_8\text{SH}$  SAM and (C)  $\text{ImdC}_{11}\text{SH}$  SAM modified Au electrode in pH7 phosphate buffer with  $\text{KPF}_6$  supporting electrolyte using Pt as counter electrode and Ag/AgCl in sat. KCl reference electrode. CV data was collected at  $1 \text{ V s}^{-1}$  scan rate and LSV of ORR data was collected at  $50 \text{ mV s}^{-1}$

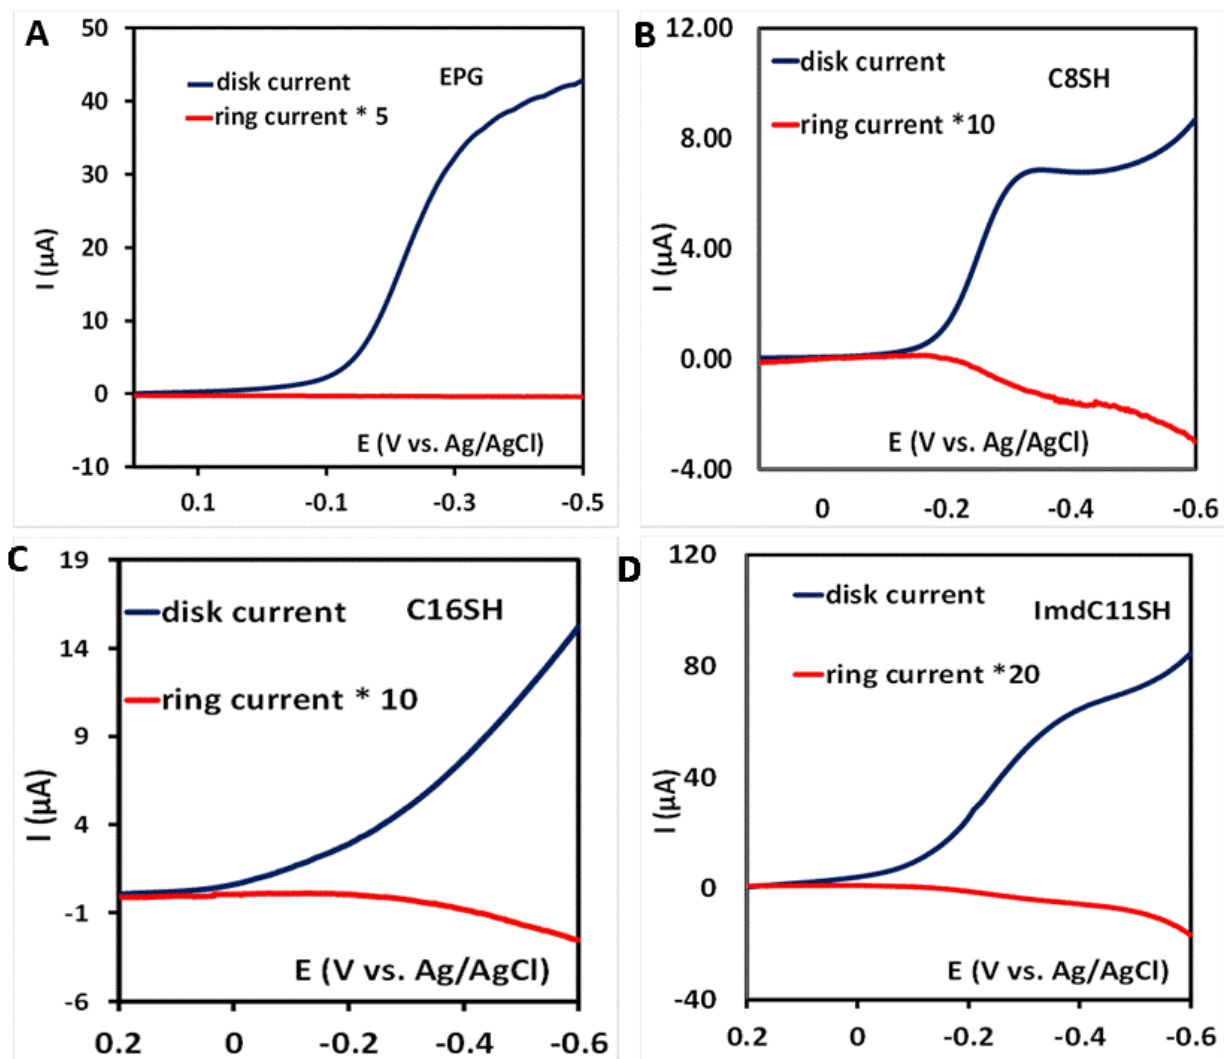

**Figure. S9.** RRDE data of the complex  $\text{Fe}^{\text{III}}\text{Cl-MeMARG}$  on (A) EPG, (B)  $\text{C}_8\text{SH}$  SAM modified Au electrode, (C)  $\text{C}_{16}\text{SH}$  SAM modified Au electrode and (D)  $\text{ImdC}_{11}\text{SH}$  SAM modified Au electrode at 10 mV/s scan rate, at 300 rpm using Pt counter electrode and Ag/AgCl (sat. KCl) as ref. electrode.

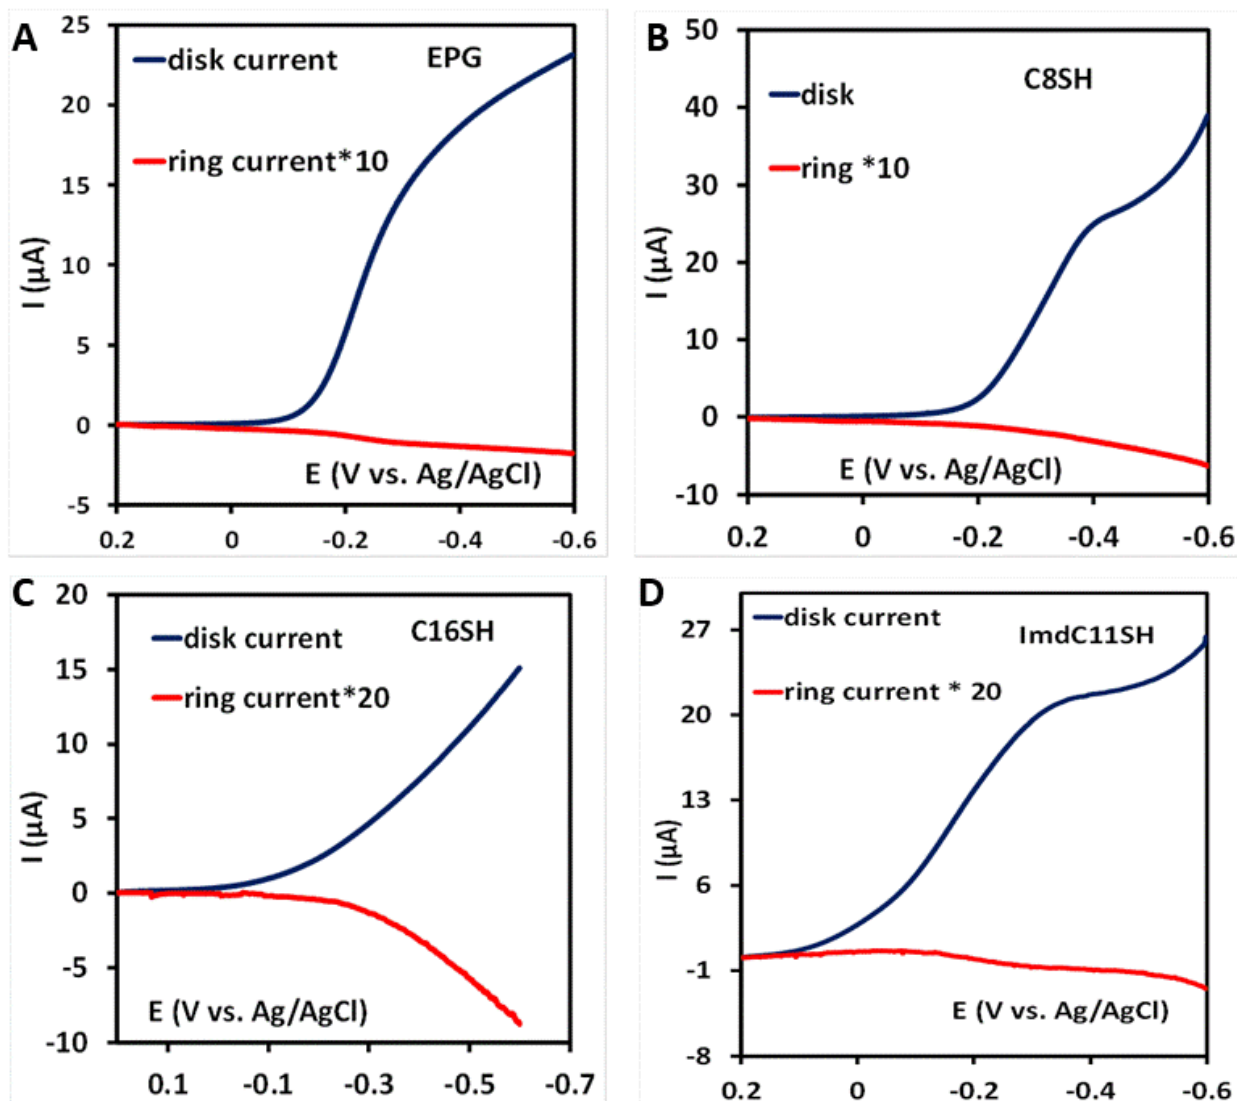

**Figure S10.** RRDE data of the complex  $\text{Fe}^{\text{III}}\text{Cl-PhMARG}$  on (A) EPG, (B) C<sub>8</sub>SH SAM modified Au electrode, (C) C<sub>16</sub>SH SAM modified Au electrode and (D) ImdC<sub>11</sub>SH SAM modified Au electrode at 10 mV/s scan rate at 300 rpm using Pt counter electrode and Ag/AgCl (sat. KCl) as ref. electrode.

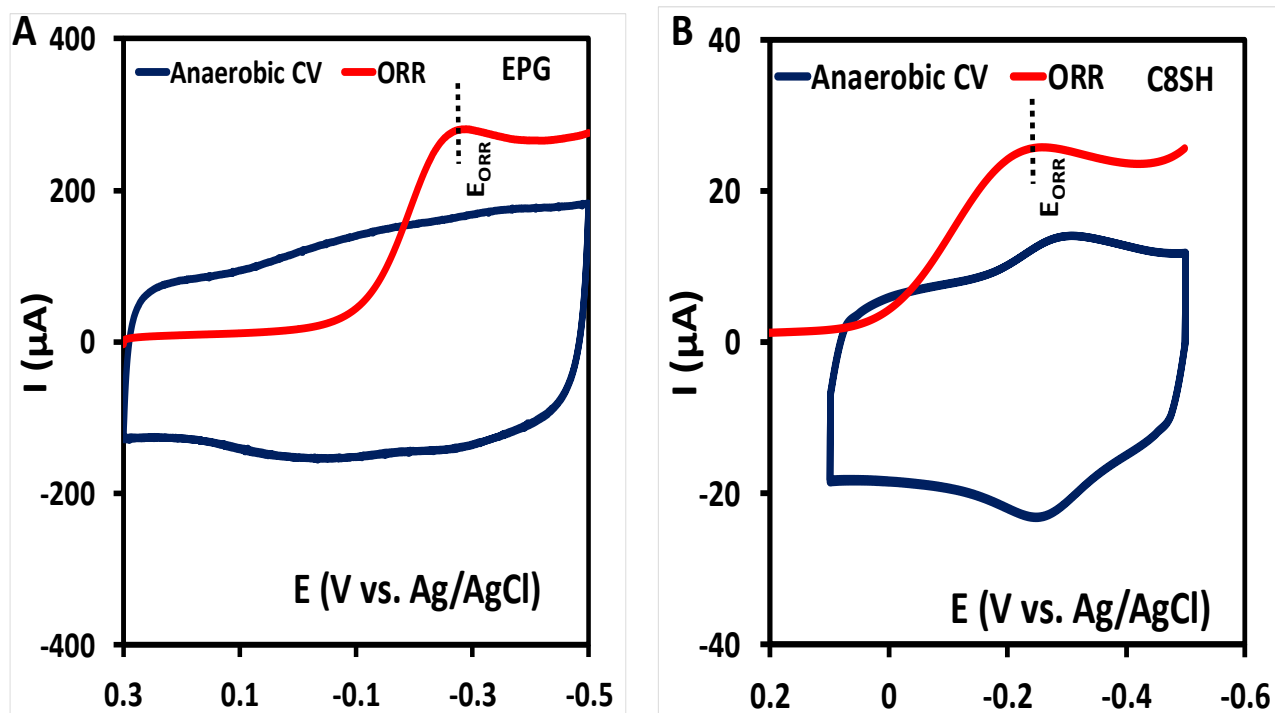

**Figure S11.** Comparison of Anaerobic CV data with the LSV of ORR for Fe-MARG-N-MeImd complex in (A) EPG and (B) C<sub>8</sub>SH SAM modified Au electrode in pH7 phosphate buffer with KPF<sub>6</sub> supporting electrolyte using Pt as counter electrode and Ag/AgCl in sat. KCl reference electrode. CV data was collected at 1 V s<sup>-1</sup> scan rate and LSV of ORR data was collected at 50 mV s<sup>-1</sup>

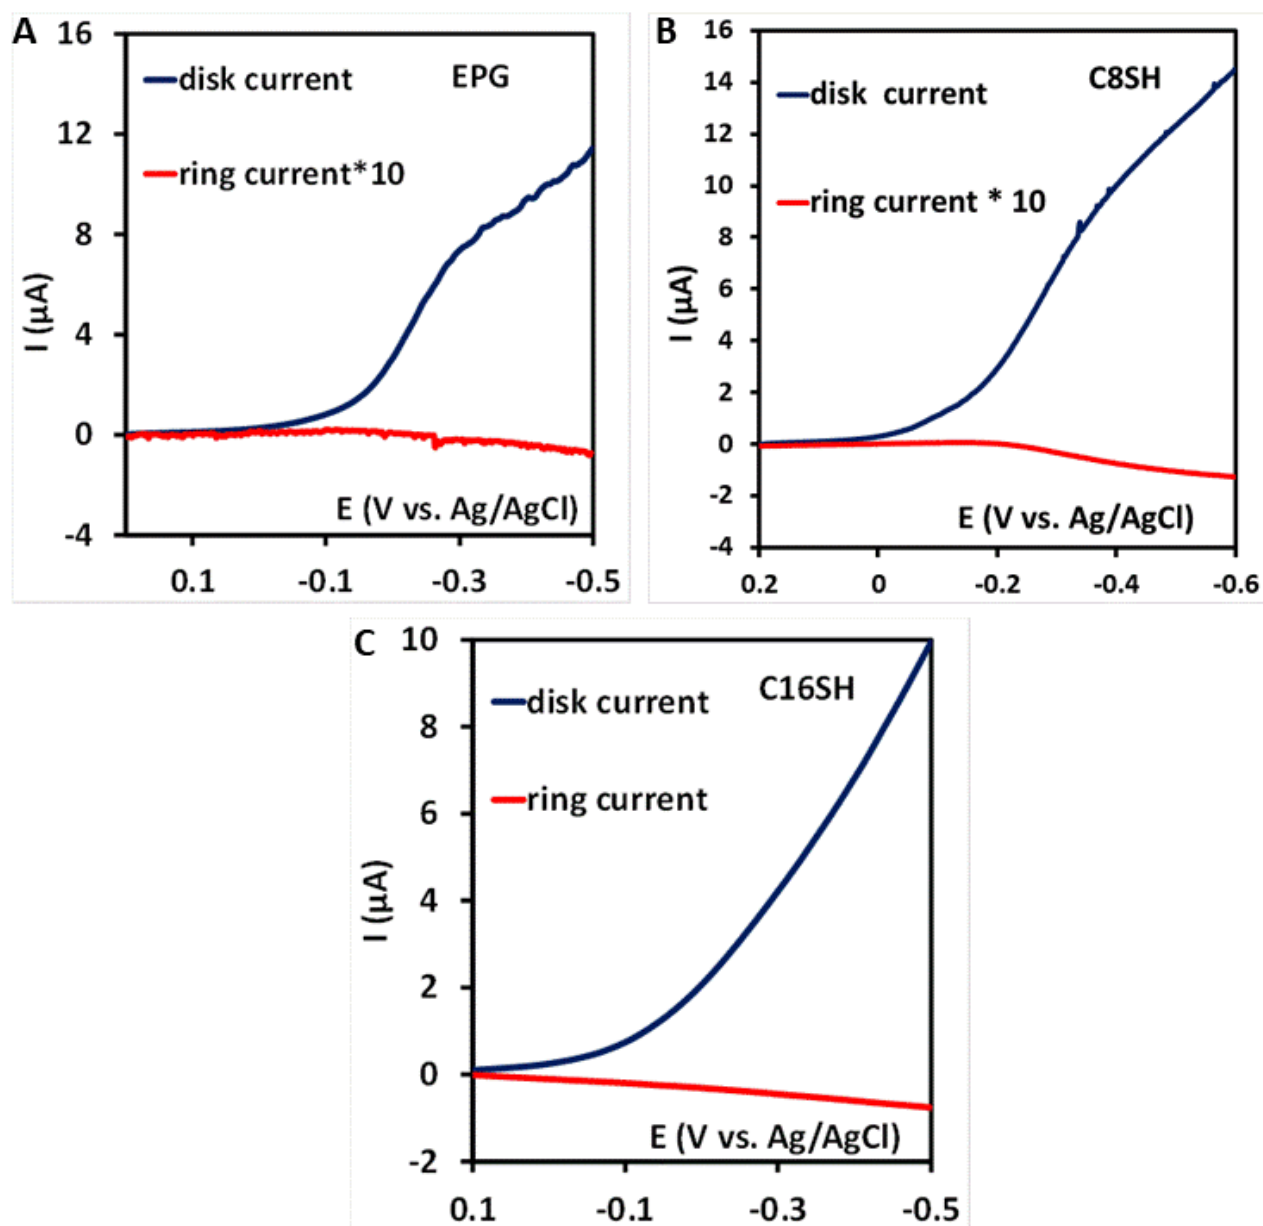

**Figure S12.** RRDE data of the complex Fe-MARG-N-Melmd on (A) EPG, (B) C<sub>8</sub>SH SAM modified Au electrode and (C) C<sub>16</sub>SH SAM modified Au electrode at 10 mV/s scan rate at 300 rpm using Pt counter electrode and Ag/AgCl (sat. KCl) as ref. electrode



## 6. DFT Optimized Structures.

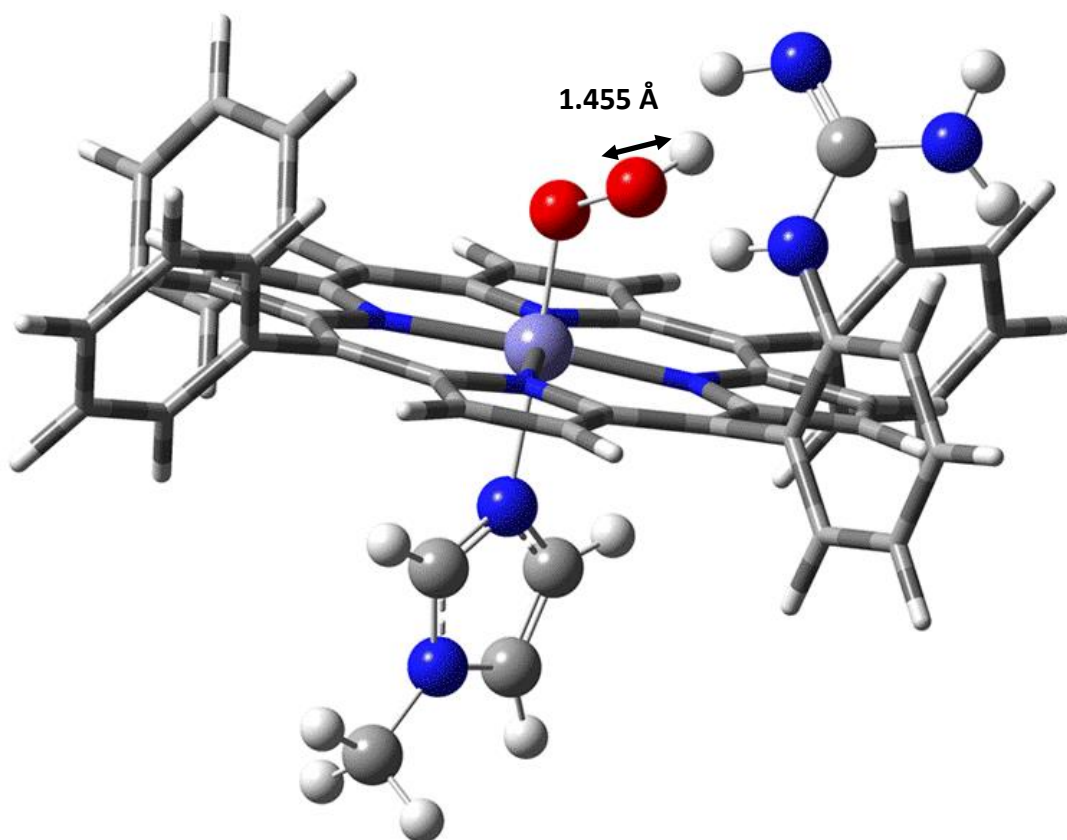

**Figure S13.** DFT optimized structure of N-Methylimidazole bound neutral Fe<sup>III</sup>-MARG-hydroperoxide

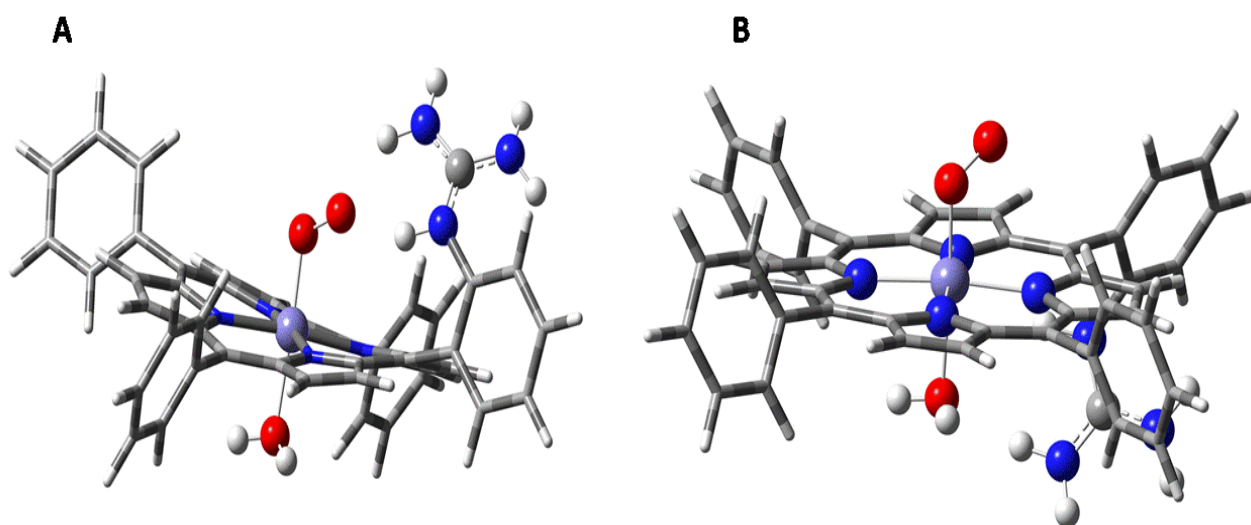

**Figure S14.** DFT optimized structure of water bound protonated  $\text{Fe}^{\text{III}}$ -MARG-superoxide (A) superoxide in the same side of guanidinium (B) superoxide in the opposite site of guanidinium

**Optimized Coordinates.**

**Protonated Fe<sup>III</sup>-MARG-N-Melmd-OOH.**

|    | X          | Y          | Z          |
|----|------------|------------|------------|
| Fe | 3.20683100 | 9.30397300 | 6.70143400 |
| N  | 5.04298200 | 9.27322000 | 5.88853600 |
| N  | 2.39679800 | 9.24062100 | 4.84151700 |
| N  | 1.37592900 | 9.41583000 | 7.48185500 |
| N  | 4.03475100 | 9.40550000 | 8.51933300 |
| C  | 6.40484200 | 9.01138900 | 7.94186300 |
| C  | 4.45197000 | 9.48984600 | 3.48511500 |
| C  | 3.06339600 | 9.39189300 | 3.63935800 |
| C  | 1.06107000 | 9.10567900 | 4.52226400 |
| C  | 6.78812800 | 9.28185000 | 4.37612100 |
| C  | 7.32911500 | 9.09257400 | 5.60825700 |
| C  | 6.23670500 | 9.09542900 | 6.55128300 |
| C  | 5.35804600 | 9.38186500 | 4.55340800 |
| C  | 0.88603000 | 9.14515800 | 3.09385500 |
| C  | 2.11752200 | 9.36170600 | 2.55099200 |
| C  | 1.98023900 | 9.75077100 | 9.85976700 |
| C  | 3.36505800 | 9.58406000 | 9.70452300 |
| C  | 1.06553100 | 9.62684800 | 8.80672300 |

|   |             |             |             |
|---|-------------|-------------|-------------|
| C | 0.02135600  | 8.99983900  | 5.45477000  |
| C | 4.28672200  | 9.48026600  | 10.81343000 |
| C | 5.35184900  | 9.18508900  | 8.85111100  |
| C | 5.50922300  | 9.20935100  | 10.28771200 |
| C | -0.91211300 | 9.31147600  | 7.77019400  |
| C | -0.36791800 | 9.60616700  | 8.98093300  |
| C | 0.18323300  | 9.21400900  | 6.83332600  |
| H | 7.29934900  | 9.33209200  | 3.42619300  |
| H | 8.37074100  | 8.97381700  | 5.86718400  |
| H | -0.06245600 | 9.06803700  | 2.58013900  |
| H | 2.37064000  | 9.48045800  | 1.50775800  |
| H | 4.01433700  | 9.56997700  | 11.85462000 |
| H | 6.43694300  | 9.03984600  | 10.81351900 |
| H | -1.95900700 | 9.21109600  | 7.52135100  |
| H | -0.88140600 | 9.77819500  | 9.91518500  |
| C | 7.78138800  | 8.75774000  | 8.47329600  |
| C | 8.48991500  | 9.75452400  | 9.16239600  |
| C | 8.39146800  | 7.50758700  | 8.28315100  |
| C | 9.77393100  | 9.50811200  | 9.65052000  |
| H | 8.03250500  | 10.72921900 | 9.31004300  |

|   |             |             |             |
|---|-------------|-------------|-------------|
| C | 9.67433900  | 7.26042300  | 8.77389100  |
| H | 7.84987500  | 6.72711800  | 7.75612600  |
| C | 10.36928000 | 8.25976700  | 9.45819800  |
| H | 10.30993900 | 10.29256500 | 10.17770600 |
| H | 10.12929200 | 6.28525300  | 8.62371800  |
| H | 11.36830100 | 8.06725000  | 9.83892000  |
| C | -1.32280300 | 8.51825400  | 5.00146200  |
| C | -2.33913300 | 9.37620700  | 4.57163800  |
| C | -1.61063500 | 7.13593400  | 5.09100900  |
| C | -3.61104300 | 8.89500500  | 4.24919800  |
| H | -2.12482600 | 10.43851900 | 4.50269300  |
| C | -2.90249000 | 6.65818900  | 4.83746500  |
| C | -3.89511000 | 7.53951000  | 4.40105900  |
| H | -4.38177800 | 9.58132800  | 3.91243000  |
| H | -3.16034400 | 5.62334700  | 5.04159500  |
| H | -4.89374800 | 7.16166500  | 4.20421500  |
| C | 1.45399200  | 9.99303100  | 11.24202800 |
| C | 0.78403000  | 8.98247900  | 11.94922400 |
| C | 1.63565600  | 11.24046600 | 11.85875600 |
| C | 0.30373400  | 9.21587000  | 13.23886400 |

|   |             |             |             |
|---|-------------|-------------|-------------|
| H | 0.65064400  | 8.00832500  | 11.48689700 |
| C | 1.15300100  | 11.47456600 | 13.14739300 |
| H | 2.15286100  | 12.02989200 | 11.32011500 |
| C | 0.48561000  | 10.46283200 | 13.84067100 |
| H | -0.20770100 | 8.42124100  | 13.77515100 |
| H | 1.29764600  | 12.44763600 | 13.60875900 |
| H | 0.11185200  | 10.64412300 | 14.84444400 |
| C | 5.00814200  | 9.66004700  | 2.10460200  |
| C | 4.94943200  | 8.61978600  | 1.16380900  |
| C | 5.61130300  | 10.87095900 | 1.72990500  |
| C | 5.47658000  | 8.78680700  | -0.11779900 |
| H | 4.49834600  | 7.67213100  | 1.44550800  |
| C | 6.13676000  | 11.03915600 | 0.44795000  |
| H | 5.66171300  | 11.68362900 | 2.44931800  |
| C | 6.07063100  | 9.99754900  | -0.47972500 |
| H | 5.42869700  | 7.96862800  | -0.83125400 |
| H | 6.59625400  | 11.98477600 | 0.17369000  |
| H | 6.48124300  | 10.12757200 | -1.47698800 |
| N | -0.55048800 | 6.27356100  | 5.51301800  |
| H | 0.20319000  | 6.72432500  | 6.04587000  |

|   |             |             |            |
|---|-------------|-------------|------------|
| C | -0.23463000 | 5.05302000  | 5.05314700 |
| N | -1.03387600 | 4.38553200  | 4.19779900 |
| N | 0.89109900  | 4.47824100  | 5.49822900 |
| H | -0.68354100 | 3.56026600  | 3.73262700 |
| O | 3.24958700  | 7.50140200  | 6.91654500 |
| O | 2.24564000  | 6.77986500  | 6.13321500 |
| H | 1.16596200  | 3.56602900  | 5.16479600 |
| H | -1.78285100 | 4.88488600  | 3.73713900 |
| H | 1.59741700  | 5.06123700  | 5.96672500 |
| H | 2.41008500  | 7.16041900  | 5.24879400 |
| N | 3.24088400  | 11.35244500 | 6.59552400 |
| C | 4.21966500  | 12.13567400 | 7.02796300 |
| C | 2.27756600  | 12.18978600 | 6.07202500 |
| H | 5.13187300  | 11.79765100 | 7.49437300 |
| C | 2.69228800  | 13.48696400 | 6.19528100 |
| H | 1.36356800  | 11.80356100 | 5.65051800 |
| H | 2.23209800  | 14.42163700 | 5.91339600 |
| N | 3.93286300  | 13.43844200 | 6.80589200 |
| C | 4.77442600  | 14.57970800 | 7.14541600 |
| H | 4.24852600  | 15.24639600 | 7.83448700 |

|   |            |             |            |
|---|------------|-------------|------------|
| H | 5.68486000 | 14.21855500 | 7.62682200 |
| H | 5.04559100 | 15.13345500 | 6.24217500 |

# Protonated Fe-TPP-N-Meimd-OOH.

|   | X          | Y          | Z           |
|---|------------|------------|-------------|
| C | 6.01193200 | 3.77161600 | 14.08533900 |
| C | 7.07258100 | 3.05115500 | 14.63665100 |
| H | 7.24023500 | 3.07724600 | 15.71024600 |
| C | 7.90950900 | 2.29316100 | 13.81498500 |
| H | 8.73507800 | 1.73176800 | 14.24437200 |
| C | 7.67606800 | 2.25786600 | 12.43869900 |
| H | 8.32206200 | 1.67073700 | 11.79090400 |
| C | 6.61440200 | 2.97778700 | 11.88867200 |
| H | 6.43565200 | 2.95049300 | 10.81729600 |
| C | 5.76804900 | 3.74843400 | 12.70235600 |
| C | 4.63207300 | 4.51711500 | 12.10331500 |
| C | 3.56729300 | 3.79482200 | 11.54566400 |
| C | 3.42468900 | 2.36169300 | 11.66361900 |
| H | 4.11829900 | 1.70835000 | 12.17194300 |
| C | 2.25292000 | 2.03257800 | 11.06164600 |



|   |             |             |             |
|---|-------------|-------------|-------------|
| H | 1.80101200  | 1.05559100  | 10.97566100 |
| C | 1.68665400  | 3.25894700  | 10.54670200 |
| C | 0.50486400  | 3.32089500  | 9.79469800  |
| C | -0.23782700 | 2.04931400  | 9.52452600  |
| C | 0.30301000  | 1.05004500  | 8.69963300  |
| H | 1.27936400  | 1.20628500  | 8.24896600  |
| C | -0.40028000 | -0.12967400 | 8.45042800  |
| H | 0.03348600  | -0.88976600 | 7.80564200  |
| C | -1.65809000 | -0.33056600 | 9.02275400  |
| H | -2.20597400 | -1.24915700 | 8.82990500  |
| C | -2.20739600 | 0.65577800  | 9.84473600  |
| H | -3.18361500 | 0.50594000  | 10.29852900 |
| C | -1.50430200 | 1.83566300  | 10.09239700 |
| H | -1.92868800 | 2.59918700  | 10.73801100 |
| C | -0.01607100 | 4.50931000  | 9.26103600  |
| C | -1.12645800 | 4.55576900  | 8.33545500  |
| H | -1.67606700 | 3.69561400  | 7.98233400  |
| C | -1.30491900 | 5.85961800  | 7.99844400  |
| H | -2.03245900 | 6.27751600  | 7.31858400  |
| C | -0.32282500 | 6.62065800  | 8.73743600  |

|   |             |             |             |
|---|-------------|-------------|-------------|
| C | -0.24714500 | 8.01990700  | 8.73392200  |
| C | -1.22008000 | 8.78721700  | 7.89351300  |
| C | -0.77515500 | 9.52379900  | 6.78407100  |
| H | 0.28345500  | 9.52217000  | 6.53913500  |
| C | -1.67415300 | 10.24495000 | 5.99673900  |
| H | -1.31066200 | 10.80501700 | 5.13888700  |
| C | -3.03552400 | 10.24456300 | 6.30733600  |
| H | -3.73617200 | 10.80660800 | 5.69549400  |
| C | -3.49080800 | 9.51928800  | 7.41050400  |
| H | -4.54764700 | 9.51898700  | 7.66449000  |
| C | -2.59126000 | 8.79725600  | 8.19657200  |
| H | -2.94615700 | 8.24186000  | 9.06008300  |
| C | 0.65946800  | 8.74592600  | 9.51910000  |
| C | 0.60809500  | 10.18138700 | 9.67931200  |
| H | -0.11080400 | 10.83342400 | 9.20548100  |
| C | 1.59307900  | 10.51525300 | 10.55245500 |
| H | 1.84092600  | 11.49568600 | 10.93136700 |
| C | 2.27033600  | 9.28846400  | 10.90981600 |
| C | 3.40432000  | 9.23185100  | 11.73309200 |
| C | 3.95180000  | 10.50982900 | 12.28863700 |

|    |            |             |             |
|----|------------|-------------|-------------|
| C  | 4.50436400 | 11.49155500 | 11.44981500 |
| H  | 4.53136900 | 11.31710200 | 10.37765500 |
| C  | 5.01838000 | 12.67757600 | 11.97625300 |
| H  | 5.44434800 | 13.42310700 | 11.30962600 |
| C  | 4.98993600 | 12.90419400 | 13.35384900 |
| H  | 5.38901400 | 13.82782000 | 13.76455100 |
| C  | 4.44446300 | 11.93650900 | 14.20008800 |
| H  | 4.41279300 | 12.10577700 | 15.27323800 |
| C  | 3.93196700 | 10.75059400 | 13.67222800 |
| H  | 3.50144000 | 10.00291700 | 14.33232400 |
| C  | 4.08229500 | 8.04105700  | 12.04455700 |
| C  | 5.36272100 | 7.99169100  | 12.70776600 |
| H  | 5.91181900 | 8.85244400  | 13.06064900 |
| C  | 5.73009300 | 6.68179700  | 12.76960500 |
| H  | 6.63593400 | 6.26638600  | 13.18597900 |
| C  | 4.66658300 | 5.91738000  | 12.16774800 |
| Fe | 2.05158700 | 6.25940900  | 10.62121800 |
| O  | 0.95144300 | 6.29398600  | 12.03668900 |
| N  | 2.49646500 | 4.31889500  | 10.86695100 |
| N  | 0.47175400 | 5.77450300  | 9.46992600  |

|   |            |            |             |
|---|------------|------------|-------------|
| N | 1.67082400 | 8.22233700 | 10.28401800 |
| N | 3.68046400 | 6.76637900 | 11.71089300 |
| O | 1.46109100 | 5.68805900 | 13.23507800 |
| H | 2.18282700 | 6.29353100 | 13.47781000 |
| H | 5.35551000 | 4.35045400 | 14.72878400 |
| C | 3.07501600 | 5.54149800 | 7.72443800  |
| C | 4.37865700 | 6.94703200 | 8.71531900  |
| C | 4.09051600 | 5.81561000 | 6.84828400  |
| H | 2.22627200 | 4.88700200 | 7.60298000  |
| N | 4.91723400 | 6.71698000 | 7.49204500  |
| H | 4.81823500 | 7.61613500 | 9.43975400  |
| H | 4.29947900 | 5.46316900 | 5.84954600  |
| N | 3.26827600 | 6.25413800 | 8.88640500  |
| C | 6.13839900 | 7.30438200 | 6.96390700  |
| H | 6.55926000 | 7.97769800 | 7.71316700  |
| H | 6.87198000 | 6.52427600 | 6.73819000  |
| H | 5.92671200 | 7.87454200 | 6.05410300  |

**Neutral Fe<sup>III</sup>-MARG-N-Meimd-OOH.**

|    |            |            |            |
|----|------------|------------|------------|
| Fe | 3.44028500 | 9.32623100 | 6.70026000 |
|----|------------|------------|------------|

|   |            |            |             |
|---|------------|------------|-------------|
| N | 5.27197900 | 9.29696900 | 5.83527500  |
| N | 2.58456400 | 9.31856100 | 4.88378300  |
| N | 1.63658100 | 9.46243800 | 7.56928500  |
| N | 4.32537400 | 9.44069700 | 8.51997500  |
| C | 6.70664200 | 9.36482600 | 7.85078600  |
| C | 4.60046400 | 9.16322500 | 3.45432700  |
| C | 3.21659700 | 9.22359000 | 3.66513600  |
| C | 1.23799200 | 9.31433600 | 4.61254700  |
| C | 6.97230800 | 9.14566400 | 4.27437900  |
| C | 7.55857400 | 9.22454400 | 5.49656200  |
| C | 6.49307100 | 9.30343200 | 6.46838000  |
| C | 5.54479600 | 9.19948300 | 4.49008300  |
| C | 1.01452200 | 9.23957500 | 3.18905300  |
| C | 2.23850400 | 9.19621600 | 2.60097300  |
| C | 2.30670500 | 9.46365500 | 9.95417000  |
| C | 3.69228500 | 9.43008200 | 9.74030600  |
| C | 1.36298600 | 9.48407500 | 8.91753800  |
| C | 0.20606400 | 9.34781100 | 5.55650300  |
| C | 4.66701000 | 9.37850700 | 10.80655000 |
| C | 5.67251700 | 9.40737800 | 8.79307900  |

|   |             |             |             |
|---|-------------|-------------|-------------|
| C | 5.89145500  | 9.36972700  | 10.22053800 |
| C | -0.65093500 | 9.49246200  | 7.90603300  |
| C | -0.06617000 | 9.53177900  | 9.13132700  |
| C | 0.41694800  | 9.44552800  | 6.93596600  |
| H | 7.45161600  | 9.05912600  | 3.31039800  |
| H | 8.61287900  | 9.22233700  | 5.73021000  |
| H | 0.04284600  | 9.23877800  | 2.71650500  |
| H | 2.47106600  | 9.14932500  | 1.54718700  |
| H | 4.43316200  | 9.33749600  | 11.86006500 |
| H | 6.85864600  | 9.31999700  | 10.69852300 |
| H | -1.70431200 | 9.50088300  | 7.66617200  |
| H | -0.54751700 | 9.58045400  | 10.09694100 |
| C | 8.11887600  | 9.35281000  | 8.35223900  |
| C | 8.69242300  | 10.50701700 | 8.90776400  |
| C | 8.89654500  | 8.18632200  | 8.28019200  |
| C | 10.00766300 | 10.49708700 | 9.37571700  |
| H | 8.10084500  | 11.41662300 | 8.96639800  |
| C | 10.21171500 | 8.17538000  | 8.74794900  |
| H | 8.45969700  | 7.28473100  | 7.86003400  |
| C | 10.77174600 | 9.33105600  | 9.29656700  |

|   |             |             |             |
|---|-------------|-------------|-------------|
| H | 10.43598900 | 11.40200100 | 9.79919900  |
| H | 10.79679100 | 7.26139500  | 8.68741400  |
| H | 11.79564900 | 9.32266100  | 9.66078200  |
| C | -1.18750200 | 9.06433700  | 5.08151100  |
| C | -2.08495700 | 10.08094000 | 4.74791900  |
| C | -1.59946300 | 7.70704000  | 4.98128900  |
| C | -3.37894100 | 9.79255600  | 4.30801900  |
| H | -1.75238900 | 11.11257900 | 4.83016400  |
| C | -2.91195900 | 7.42429100  | 4.56285200  |
| C | -3.78162600 | 8.45980300  | 4.22106400  |
| H | -4.06077600 | 10.59620900 | 4.04538700  |
| H | -3.24629500 | 6.39435200  | 4.52412100  |
| H | -4.79073400 | 8.21513500  | 3.89896700  |
| C | 1.80606200  | 9.44510900  | 11.36637400 |
| C | 1.14697900  | 8.31424900  | 11.87498600 |
| C | 1.98554100  | 10.55012300 | 12.21338200 |
| C | 0.68069100  | 8.29070300  | 13.19033600 |
| H | 1.00967000  | 7.44932900  | 11.23234700 |
| C | 1.52003500  | 10.52792300 | 13.52918400 |
| H | 2.49471100  | 11.43214600 | 11.83365000 |

|   |             |             |             |
|---|-------------|-------------|-------------|
| C | 0.86526400  | 9.39741000  | 14.02181900 |
| H | 0.17720300  | 7.40398400  | 13.56640900 |
| H | 1.66678200  | 11.39517200 | 14.16792800 |
| H | 0.50277800  | 9.37847700  | 15.04614100 |
| C | 5.09634500  | 9.03170700  | 2.04562200  |
| C | 4.94186100  | 7.82540300  | 1.34425800  |
| C | 5.72556000  | 10.10556200 | 1.39676500  |
| C | 5.40230800  | 7.69705100  | 0.03283700  |
| H | 4.46292000  | 6.98401800  | 1.83720500  |
| C | 6.18715100  | 9.97868300  | 0.08541800  |
| H | 5.84997000  | 11.04624500 | 1.92658400  |
| C | 6.02637100  | 8.77346400  | -0.60102700 |
| H | 5.27701800  | 6.75334300  | -0.49162300 |
| H | 6.66917400  | 10.82319200 | -0.40033200 |
| H | 6.38528600  | 8.67352800  | -1.62190800 |
| N | -0.68321300 | 6.71559300  | 5.36171700  |
| H | 0.12789700  | 7.05024900  | 5.87438000  |
| C | -0.53190400 | 5.39219500  | 4.93841400  |
| N | -1.37157300 | 4.97190300  | 3.90749600  |
| N | 0.30948700  | 4.56199800  | 5.44353200  |



|   |             |             |            |
|---|-------------|-------------|------------|
| H | -1.07020100 | 4.06395600  | 3.57166200 |
| O | 3.48589800  | 7.53983700  | 6.81899300 |
| O | 2.26889100  | 6.86081700  | 6.40105600 |
| H | -1.50192100 | 5.64290700  | 3.15792300 |
| H | 2.59279000  | 6.38944700  | 5.61255700 |
| N | 3.49554000  | 11.42569800 | 6.61023300 |
| C | 3.05843000  | 12.25233800 | 7.54582300 |
| C | 3.97009200  | 12.21836900 | 5.58756200 |
| H | 2.61988500  | 11.95843200 | 8.48709700 |
| C | 3.81189700  | 13.53616900 | 5.92138000 |
| H | 4.38651600  | 11.78727300 | 4.69134500 |
| H | 4.05217900  | 14.44835400 | 5.39673100 |
| N | 3.22899200  | 13.54623100 | 7.17545600 |
| C | 2.86037800  | 14.72034100 | 7.95086200 |
| H | 2.12049200  | 15.31949900 | 7.41128000 |
| H | 2.42724500  | 14.39684700 | 8.89930600 |
| H | 3.74147900  | 15.33599800 | 8.15616700 |
| H | 0.76654500  | 4.95405300  | 6.26896700 |

**Fe<sup>III</sup>-MARG-superoxide (Fig. S13 A).**

|    | X          | Y          | Z          |
|----|------------|------------|------------|
| Fe | 3.26325900 | 9.31169000 | 6.66862700 |
| N  | 5.07638000 | 9.22712100 | 5.84293000 |
| N  | 2.41777000 | 9.32084700 | 4.86956600 |
| N  | 1.46038600 | 9.57641700 | 7.49699400 |
| N  | 4.13164500 | 9.46302900 | 8.46724200 |
| C  | 6.46981000 | 8.91156600 | 7.86563000 |
| C  | 4.44718400 | 9.46439000 | 3.45672400 |
| C  | 3.06319400 | 9.40412600 | 3.65213400 |
| C  | 1.08119800 | 9.17603200 | 4.58288300 |
| C  | 6.79401200 | 9.20357100 | 4.29857900 |
| C  | 7.35164600 | 8.98333800 | 5.51833000 |
| C  | 6.27884400 | 9.00806400 | 6.48051200 |
| C  | 5.37210100 | 9.33715100 | 4.50226900 |
| C  | 0.87608100 | 9.16277400 | 3.15814000 |
| C  | 2.09693900 | 9.34569700 | 2.58362600 |
| C  | 2.12692900 | 9.94846900 | 9.85575200 |
| C  | 3.49599200 | 9.70077000 | 9.66978400 |
| C  | 1.18506100 | 9.84417100 | 8.82605400 |
| C  | 0.04700600 | 9.13160100 | 5.52517400 |

|   |             |             |             |
|---|-------------|-------------|-------------|
| C | 4.43051600  | 9.55615200  | 10.75621500 |
| C | 5.44423400  | 9.15898200  | 8.78552400  |
| C | 5.62369500  | 9.19352300  | 10.21257300 |
| C | -0.82580100 | 9.57200700  | 7.84169300  |
| C | -0.24184400 | 9.89377100  | 9.02790500  |
| C | 0.23715700  | 9.39664600  | 6.88604900  |
| H | 7.28846800  | 9.25787900  | 3.34006700  |
| H | 8.39419500  | 8.83822700  | 5.75905200  |
| H | -0.08562100 | 9.08749900  | 2.66971700  |
| H | 2.33336100  | 9.42689700  | 1.53298500  |
| H | 4.18666000  | 9.68272700  | 11.80053000 |
| H | 6.54782100  | 8.97410000  | 10.72590100 |
| H | -1.88120900 | 9.49917500  | 7.62117300  |
| H | -0.72623000 | 10.12215100 | 9.96555800  |
| C | 7.83967700  | 8.58728800  | 8.37241400  |
| C | 8.60773300  | 9.54508600  | 9.05344500  |
| C | 8.38411900  | 7.31052800  | 8.16149900  |
| C | 9.88688600  | 9.23193800  | 9.51529500  |
| H | 8.20360100  | 10.54138400 | 9.21047300  |
| C | 9.66168700  | 6.99723700  | 8.62747200  |

|   |             |             |             |
|---|-------------|-------------|-------------|
| H | 7.79663900  | 6.56121900  | 7.63821600  |
| C | 10.41625300 | 7.95688400  | 9.30541600  |
| H | 10.47106400 | 9.98622600  | 10.03501100 |
| H | 10.06589800 | 6.00239800  | 8.46238500  |
| H | 11.41136000 | 7.71339800  | 9.66652000  |
| C | -1.30022500 | 8.65093100  | 5.08279700  |
| C | -2.36779300 | 9.50171600  | 4.78161000  |
| C | -1.51885100 | 7.25591900  | 5.01674800  |
| C | -3.62035900 | 8.99350700  | 4.42592600  |
| H | -2.20750300 | 10.57485000 | 4.82634500  |
| C | -2.78405700 | 6.74130600  | 4.71235400  |
| C | -3.82883400 | 7.61550800  | 4.40161000  |
| H | -4.43273500 | 9.67319000  | 4.18809500  |
| H | -2.97382400 | 5.67369700  | 4.77321900  |
| H | -4.80855600 | 7.21273300  | 4.16360700  |
| C | 1.65149900  | 10.26061200 | 11.24216300 |
| C | 0.92215800  | 9.32113400  | 11.98778700 |
| C | 1.94502300  | 11.50302000 | 11.82531600 |
| C | 0.49288600  | 9.62020100  | 13.28182700 |
| H | 0.70319100  | 8.34960300  | 11.55343100 |

|   |             |             |             |
|---|-------------|-------------|-------------|
| C | 1.51331800  | 11.80282700 | 13.11830000 |
| H | 2.51096200  | 12.23832100 | 11.25947200 |
| C | 0.78566600  | 10.86200200 | 13.84967300 |
| H | -0.06534900 | 8.87992300  | 13.84818700 |
| H | 1.74511900  | 12.77128200 | 13.55263100 |
| H | 0.45122000  | 11.09387300 | 14.85677700 |
| C | 4.97358100  | 9.60756100  | 2.06127400  |
| C | 4.91372500  | 8.54229900  | 1.14954100  |
| C | 5.54991100  | 10.81858300 | 1.64801700  |
| C | 5.41516100  | 8.68563700  | -0.14523800 |
| H | 4.48207500  | 7.59571500  | 1.46370000  |
| C | 6.04929500  | 10.96210300 | 0.35253600  |
| H | 5.60034800  | 11.64982100 | 2.34583400  |
| C | 5.98305400  | 9.89636800  | -0.54726600 |
| H | 5.36749100  | 7.84963400  | -0.83770100 |
| H | 6.48871400  | 11.90743700 | 0.04673600  |
| H | 6.37361000  | 10.00778800 | -1.55473900 |
| N | -0.41559700 | 6.41001400  | 5.34976100  |
| H | 0.28735900  | 6.83779300  | 5.96118700  |
| C | 0.00928000  | 5.31470100  | 4.70124800  |

|   |             |             |            |
|---|-------------|-------------|------------|
| N | -0.70656700 | 4.77117200  | 3.69850100 |
| N | 1.14707200  | 4.73453500  | 5.10190100 |
| H | -0.30368700 | 4.04008200  | 3.13044200 |
| O | 3.26073400  | 7.46649400  | 6.79284800 |
| O | 2.14272100  | 6.82601900  | 6.62998300 |
| H | 1.51143800  | 3.92726000  | 4.61808000 |
| H | -1.46660800 | 5.30215600  | 3.29461200 |
| H | 1.75702000  | 5.22039400  | 5.77055100 |
| O | 3.38464300  | 11.37680100 | 6.55603700 |
| H | 4.00957600  | 11.66309300 | 7.24513300 |
| H | 2.51269900  | 11.72580500 | 6.81163100 |

**Fe<sup>III</sup>-MARG-superoxide (Fig. S13 B).**

|    | X          | Y          | Z          |
|----|------------|------------|------------|
| Fe | 3.42549100 | 9.25417700 | 6.62241900 |
| N  | 5.27354600 | 9.16117100 | 5.81498700 |
| N  | 2.61546900 | 9.05313100 | 4.79906300 |
| N  | 1.60081900 | 9.15792100 | 7.44958500 |
| N  | 4.26191800 | 9.25525000 | 8.45920900 |
| C  | 6.66512200 | 9.37647100 | 7.85523800 |

|   |             |            |             |
|---|-------------|------------|-------------|
| C | 4.67193400  | 9.00094000 | 3.41529400  |
| C | 3.28478000  | 8.97108700 | 3.59742800  |
| C | 1.27636100  | 9.06431300 | 4.48134200  |
| C | 7.01189700  | 9.20980000 | 4.28431600  |
| C | 7.56544700  | 9.33767100 | 5.51789400  |
| C | 6.48401400  | 9.29770500 | 6.47047500  |
| C | 5.58458900  | 9.11920000 | 4.47020700  |
| C | 1.10096400  | 8.95358200 | 3.05198100  |
| C | 2.34301200  | 8.89957900 | 2.50587800  |
| C | 2.21249500  | 9.22159800 | 9.85504800  |
| C | 3.59971600  | 9.24500600 | 9.67318500  |
| C | 1.29638100  | 9.20841600 | 8.79394200  |
| C | 0.22346400  | 9.15505300 | 5.39639100  |
| C | 4.54937300  | 9.26440100 | 10.75797000 |
| C | 5.60550200  | 9.32901600 | 8.77159800  |
| C | 5.78731900  | 9.32309200 | 10.20119100 |
| C | -0.68856800 | 9.30224900 | 7.73342300  |
| C | -0.12866200 | 9.29116600 | 8.97699800  |
| C | 0.39799700  | 9.21130700 | 6.78672800  |
| H | 7.51354000  | 9.19018400 | 3.32822200  |

|   |             |             |             |
|---|-------------|-------------|-------------|
| H | 8.60921400  | 9.44676700  | 5.77124200  |
| H | 0.15260500  | 8.94148800  | 2.53436400  |
| H | 2.61125800  | 8.83341600  | 1.46188800  |
| H | 4.29293100  | 9.23429000  | 11.80644800 |
| H | 6.74273500  | 9.34805200  | 10.70347300 |
| H | -1.73300300 | 9.44064700  | 7.48512500  |
| H | -0.62734600 | 9.37534200  | 9.93130100  |
| C | 8.05710300  | 9.52023400  | 8.38939000  |
| C | 8.46980400  | 10.72789300 | 8.97411800  |
| C | 8.97069500  | 8.45705500  | 8.31836900  |
| C | 9.76555800  | 10.86855300 | 9.47305100  |
| H | 7.77255100  | 11.55933500 | 9.02730100  |
| C | 10.26533900 | 8.59743600  | 8.82068500  |
| H | 8.66134000  | 7.51519100  | 7.87301200  |
| C | 10.66614400 | 9.80387700  | 9.39839900  |
| H | 10.07166700 | 11.81188300 | 9.91658100  |
| H | 10.95917500 | 7.76334500  | 8.76258000  |
| H | 11.67436000 | 9.91378000  | 9.78754700  |
| C | -1.17332000 | 9.16261400  | 4.86021200  |
| C | -1.67397400 | 10.25605700 | 4.13727400  |



|   |             |             |             |
|---|-------------|-------------|-------------|
| C | -2.04047400 | 8.06918300  | 5.05421300  |
| C | -2.96971700 | 10.25128900 | 3.61838700  |
| H | -1.02825200 | 11.11573600 | 3.98833500  |
| C | -3.34779700 | 8.06078100  | 4.55727200  |
| C | -3.80878600 | 9.15367800  | 3.82326100  |
| H | -3.32880900 | 11.11241100 | 3.06291500  |
| H | -3.99834300 | 7.21536400  | 4.76317600  |
| H | -4.82240900 | 9.15455100  | 3.43490600  |
| C | 1.67694700  | 9.24947000  | 11.25411600 |
| C | 1.06768500  | 8.11524000  | 11.81256200 |
| C | 1.77372000  | 10.41416100 | 12.03181200 |
| C | 0.57058900  | 8.14232100  | 13.11672700 |
| H | 0.99501300  | 7.20487100  | 11.22300300 |
| C | 1.27393100  | 10.44215900 | 13.33466400 |
| H | 2.23622800  | 11.30056400 | 11.60697200 |
| C | 0.67229200  | 9.30643900  | 13.88100900 |
| H | 0.10905500  | 7.25295800  | 13.53723500 |
| H | 1.35276500  | 11.35311500 | 13.92133300 |
| H | 0.28585700  | 9.32830100  | 14.89597600 |
| C | 5.20599500  | 8.93686700  | 2.01506100  |

|   |             |             |             |
|---|-------------|-------------|-------------|
| C | 5.24462000  | 7.71950700  | 1.31884300  |
| C | 5.67246400  | 10.09595900 | 1.37622100  |
| C | 5.73941900  | 7.66095500  | 0.01457800  |
| H | 4.88970100  | 6.81499900  | 1.80613900  |
| C | 6.16682400  | 10.03717000 | 0.07202500  |
| H | 5.64153800  | 11.04478000 | 1.90460900  |
| C | 6.20195300  | 8.81999900  | -0.61176700 |
| H | 5.76743100  | 6.70954200  | -0.50963900 |
| H | 6.52215400  | 10.94374000 | -0.40986500 |
| H | 6.58804200  | 8.77509700  | -1.62616000 |
| N | -1.57306900 | 6.94565800  | 5.83048500  |
| H | -1.17461800 | 7.18420200  | 6.73820700  |
| C | -1.28816700 | 5.74256700  | 5.32777000  |
| N | -1.44600200 | 5.48907400  | 4.02315000  |
| N | -0.86745600 | 4.75864800  | 6.14606200  |
| H | -1.44339100 | 4.54547400  | 3.66443100  |
| H | -0.38317800 | 3.95599100  | 5.76916200  |
| H | -1.73837300 | 6.23612500  | 3.40659000  |
| H | -0.72157800 | 4.94906200  | 7.12801600  |
| O | 3.58139500  | 7.03016000  | 6.76899300  |

|   |            |             |            |
|---|------------|-------------|------------|
| H | 4.35991300 | 6.89932100  | 6.19929900 |
| H | 3.93825500 | 6.97737900  | 7.67340200 |
| O | 3.44357300 | 11.11636000 | 6.55985900 |
| O | 2.40350100 | 11.70736700 | 6.12837000 |

## Reference.

1. J. Jordan, E. Ackerman and R. L. Berger, *Journal of the American Chemical Society*, 1956, **78**, 2979-2983.
2. M. S. Al-Abdul-Wahid, C.-H. Yu, I. Batruch, F. Evanics, R. Pomès and R. S. Prosser, *Biochemistry*, 2006, **45**, 10719-10728.
3. A. Bard and L. Faulkner, *Allen J. Bard and Larry R. Faulkner, Electrochemical Methods: Fundamentals and Applications*, New York: Wiley, 2001, 2002.
4. Y. Zhang and G. S. Wilson, *Journal of Electroanalytical Chemistry*, 1993, **345**, 253-271.
5. J. P. Perdew, *Physical Review B*, 1986, **33**, 8822-8824.
6. B. Mennucci, J. Tomasi, R. Cammi, J. R. Cheeseman, M. J. Frisch, F. J. Devlin, S. Gabriel and P. J. Stephens, *The Journal of Physical Chemistry A*, 2002, **106**, 6102-6113.
7. S. Miertuš, E. Scrocco and J. Tomasi, *Chemical Physics*, 1981, **55**, 117-129.
8. K. Sengupta, S. Chatterjee, S. Samanta, S. Bandyopadhyay and A. Dey, *Journal*, 2013, **52**, 2000-2014.
9. S. Bhakta, A. Nayek, B. Roy and A. Dey, *Inorganic Chemistry*, 2019, **58**, 2954-2964.
